# Supplementary material
Source: PubMed Central journal article supplement (PMC6904813)
Supplement: mmc2.pdf [file mmc2.pdf]

# Long Noncoding RNA-Maternally Expressed Gene 3 Contributes to Hypoxic Pulmonary Hypertension

Yan Xing,<sup>1,9</sup> Xiaodong Zheng,<sup>2,9</sup> Yao Fu,<sup>3</sup> Jing Qi,<sup>3,4</sup> Minghui Li,<sup>4</sup> Mingfei Ma,<sup>3</sup> Shuang Wang,<sup>5</sup> Shuzhen Li,<sup>5</sup> and Daling Zhu<sup>3,6,7,8</sup>

<sup>1</sup>Department of Pharmacology, Harbin Medical University-Daqing, Daqing, Heilongjiang 163319, P.R. China; <sup>2</sup>Department of Genetics and Cell Biology, Harbin Medical University-Daqing, Daqing, Heilongjiang 163319, P.R. China; <sup>3</sup>College of Pharmacy, Harbin Medical University, Harbin, 150081, P.R. China; <sup>4</sup>Department of Pharmaceutical, Harbin Medical University-Daqing, Daqing, Heilongjiang 163319, P.R. China; <sup>5</sup>Department of Biopharmaceutical Sciences, College of Pharmacy, Harbin Medical University, Harbin, Heilongjiang 150086, P.R. China; <sup>6</sup>Central Laboratory of Harbin Medical University-Daqing, Daqing 163319, P.R. China; <sup>7</sup>State Province Key Laboratories of Biomedicine-Pharmaceutics of China, Daqing 163319, P.R. China; <sup>8</sup>Key Laboratory of Cardiovascular Medicine Research, Ministry of Education, Harbin Medical University, Harbin, 150081, P.R. China

**The expression and function of long noncoding RNAs (lncRNAs) in the development of hypoxic pulmonary hypertension (HPH), especially in the proliferation of pulmonary artery smooth muscle cells (PASMCs), are largely unknown. Herein, we examined the expression and role of lncRNA-maternally expressed gene 3 (lncRNA-MEG3) in HPH. lncRNA-MEG3 was significantly increased and primarily localized in the cytoplasm of hypoxic PASMCs. lncRNA-MEG3 knockdown by lung-specific delivery of small interfering RNAs (siRNAs) significantly inhibited the development of HPH *in vivo*. Silencing of lncRNA-MEG3 by siRNAs and gapmers attenuated proliferation and cell-cycle progression in both PASMCs from idiopathic pulmonary arterial hypertension (iPAH) patients (iPAH-PASMCs) and hypoxia-exposed PASMCs *in vitro*. Mechanistically, we found that lncRNA-MEG3 interacts with and leads to the degradation of microRNA-328-3p (miR-328-3p), leading to upregulation of insulin-like growth factor 1 receptor (IGF1R). Additionally, higher expression of lncRNA-MEG3 and IGF1R and lower expression of miR-328-3p were observed in iPAH-PASMCs and relevant HPH models. These data provide insights into the contribution of lncRNA-MEG3 to HPH. Upregulation of lncRNA-MEG3 sequesters cytoplasmic miR-328-3p, eventually leading to expression of IGF1R, revealing a regulatory mechanism by lncRNAs in hypoxia-induced PASMC proliferation.**

## INTRODUCTION

Pulmonary hypertension (PH) is a severe disease resulting in right heart failure and even death.<sup>1</sup> Hypoxia is a common cause of PH in multiple diseases, such as chronic obstructive pulmonary disease, sleep apnea, and high-altitude pulmonary vascular disease, which primarily includes hypoxic pulmonary hypertension (HPH).<sup>2,3</sup> HPH is characterized by elevated pulmonary arterial pressure and hypoxia-induced pulmonary arterial remodeling (HPVR). Although many factors have been implicated in the susceptibility to HPVR, it is well-accepted that HPVR is primarily caused by excessive proliferation of pulmonary artery smooth muscle cells (PASMCs).<sup>4</sup> However, the

precise mechanism regulating the pathological process of HPVR is largely unknown.<sup>2</sup>

The roles of noncoding RNAs in HPH have been evaluated in many studies. MicroRNAs (miRNAs) are short noncoding RNAs associated with PH onset, progression, and treatment responsiveness.<sup>5</sup> Previous studies from our lab and others have shown that microRNA-328-3p (miR-328-3p) is critical in the vascular remodeling and development of HPH through targeting the expression of insulin-like growth factor 1 receptor (IGF1R), L-type calcium channel- $\alpha$ 1C,<sup>6</sup> and PIM1.<sup>7</sup> However, specific regulation of miR-328-3p expression in PASMCs is not understood. Long noncoding RNAs (lncRNAs) are a class of noncoding RNAs longer than 200 nucleotides that function in diverse biological processes.<sup>8–12</sup> Importantly, lncRNAs interact with miRNAs to modulate cell differentiation, proliferation, and death.<sup>13</sup> In particular, the “competing endogenous RNA (ceRNA) hypothesis” has been suggested, which states that many lncRNAs act as ceRNAs by sequestering target miRNAs; abundant lncRNAs harboring similar miRNA target sequences can sequester cytoplasmic miRNAs, indirectly regulating miRNA-targeted genes.<sup>14–16</sup> lncRNAs have been shown to maintain cellular homeostasis and enable adaptive survival in hypoxia-associated cancer processes.<sup>8,17–19</sup> However, the specific roles of lncRNAs in HPH remain poorly understood.

One lncRNA involved in the response to hypoxia is maternally expressed gene 3 (MEG3), which is increased during exposure to hypoxic conditions in vascular endothelial cells.<sup>20</sup> Elevated expression of lncRNA-MEG3 has also been detected in developing otocyst cells

Received 11 November 2018; accepted 26 July 2019;  
<https://doi.org/10.1016/j.ymthe.2019.07.022>.

<sup>9</sup>These authors contributed equally to this work.

**Correspondence:** Xiaodong Zheng, Department of Genetics and Cell Biology, Harbin Medical University-Daqing, Daqing, Heilongjiang 163319, P.R. China.

**E-mail:** zhengxiaodong@hmdq.edu.cn

**Correspondence:** Daling Zhu, College of Pharmacy, Harbin Medical University, Harbin, 150081, P.R. China.

**E-mail:** dalingz@yahoo.com

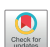

and differentiated neural cells.<sup>21</sup> Numerous studies have demonstrated that lncRNA-MEG3 is a tumor suppressor.<sup>22</sup> lncRNA-MEG3 expression is lost in multiple cancer cell lines of various tissue origins, and its overexpression inhibits tumor cell proliferation and cell-cycle progression.<sup>23–25</sup> These controversial observations suggest a role for lncRNA-MEG3 in cellular homeostasis and adaptive survival under hypoxic stress conditions, depending on the tissue and/or cell type. Specifically, using a computational prediction approach, we predicted that lncRNA-MEG3 harbors a miR-328-3p target sequence (nucleotides [nt] 2071–2094). Thus, lncRNA-MEG may be involved in the development of HPH by interacting with miR-328-3p.

In the present study, we examined the expression of lncRNA-MEG3 in pulmonary arteries (PAs) in a hypoxia-induced PH animal model and in PASCs. Upon hypoxia, upregulation of lncRNA-MEG3 binding to and sequestering miR-328-3p occurred, leading to the expression of insulin-like growth factor 1 receptor (IGF1R) and excessive proliferation of PASCs. Accordingly, lncRNA-MEG3 is highly expressed in PASCs of idiopathic pulmonary arterial hypertension (iPAH) patients, suggesting lncRNA-MEG3 as a new therapeutic target for pharmaceutical intervention of PH.

## RESULTS

### Hypoxia Increases lncRNA-MEG3 Expression

To determine the expression patterns of lncRNA-MEG3 in the development of HPH, we exposed male mice to hypoxia (10% fractional inspired oxygen [FiO<sub>2</sub>]) for 21 days. Right ventricular systolic pressure (RVSP) and right ventricular to left ventricular + spatial weight ratio (RV/LV+S), two indirect indicators of pulmonary hypertension (Figures S1A and S1B), were significantly higher in the hypoxic group than in normal controls. Moreover, H&E staining (Figure S1C) demonstrated that the morphology of pulmonary vascular remodeling, the thickness of vessel wall to vessel diameter ratio, was significantly higher in hypoxia models. Therefore, the murine model of chronic HPH was validated in our study.

Next, we assessed lncRNA-MEG3 expression in isolated pulmonary arteries (PAs) from HPH mice using real-time PCR. The results indicated that lncRNA-MEG3 was potently induced by hypoxia in a time-dependent manner (Figure 1A). Fluorescence *in situ* hybridization (FISH) analysis showing increased expression of lncRNA-MEG3 (red) and colocalization with alpha-smooth muscle actin ( $\alpha$ SMA) (green) in remodeling distal pulmonary arteries from the 21-day hypoxia mouse model (Figure 1B), indicating that lncRNA-MEG3 was primarily localized in smooth muscle layer. Moreover, lncRNA-MEG3 (red) was upregulated by hypoxia in a time-dependent manner, with significant induction at 4 days and maximal induction at 8–12 days. Increased expression of  $\alpha$ SMA was also observed, while probes targeting the SUC2 gene, which served as a negative control (NC), and nonprobe controls (PBS) did not generate any signals (Figures S2A and S2B). We also detected lncRNA-MEG3 expression in other tissues (heart, lung, spleen, liver, and kidney), as well as in isolated aorta and carotid arteries. Results showed that, with the excep-

tion of PAs, lncRNA-MEG3 was increased compared to normoxia, and all other tissues displayed decreased or unchanged expression (Figures S2C and S2D). Next, we further examined lncRNA-MEG3 expression in PASCs from iPAH patients (iPAH-PASCs). Clinical information of the iPAH patients is shown in Table S1. The use of these iPAH-PASCs followed recommendations by Bonnet et al.<sup>26</sup> Real-time PCR consistently showed that the expression of lncRNA-MEG3 was higher in iPAH-PASCs than in control PASCs (Figure 1C, left panel). To further confirm the effect of hypoxia on lncRNA-MEG3 expression, we exposed two cell lines—human PASCs (hPASCs) (Figure 1C, middle panel) and mouse PASCs (mPASCs) (Figure 1C, right panel)—to 3% FiO<sub>2</sub> to induce hypoxia and confirmed via real-time PCR that hypoxia augmented lncRNA-MEG3 expression in both cell lines in a time-dependent manner.

To examine the subcellular localization of lncRNA-MEG3, we evaluated lncRNA-MEG3 expression in cytoplasmic versus nuclear fractions using lncRNA FISH probes (red) in cultured mPASCs. As a control, probes targeting U6 or 18S RNA were used as markers of the nucleus or cytoplasm, respectively. lncRNA-MEG3 was detected in both the cytoplasm and nucleus of PASCs under normoxia conditions. After cells were exposed to hypoxia (3% FiO<sub>2</sub>) for 24 h, lncRNA-MEG3 was still highly enriched in the cytoplasm but was decreased in the nucleus of mPASCs (Figure 1D). lncRNA-MEG3 distribution in the cytoplasm increased from 69.46%  $\pm$  2.47% to 86.5%  $\pm$  2.55% yet decreased from 30.54%  $\pm$  2.47% to 13.5%  $\pm$  2.55% in the nucleus (Figure 1E). Localization of U6 and 18S RNA were not significantly changed by hypoxic conditions (Figure 1E). Moreover, by isolating cytoplasmic and nuclear RNA for real-time PCR, we confirmed that lncRNA-MEG3 expression was primarily increased in the cytoplasm but decreased in the nucleus (Figure 1F). These results indicate that lncRNA-MEG3 translocates from the nucleus to the cytoplasm during hypoxia exposure.

Because hypoxia-inducible factor (HIF) transcription factors play an important role in the hypoxia response, we examined whether lncRNA-MEG3 expression is regulated by HIF. HIF isoforms were knocked down by siRNA targeting HIF1 $\alpha$ , HIF1 $\beta$ , HIF2 $\alpha$ , and HIF2 $\beta$  or were overexpressed by plasmids (represent images shown in Figure S3A). Chromatin immunoprecipitation experiments were performed, and we found that HIF1 $\alpha$ , HIF1 $\beta$ , and HIF2 $\alpha$  were able to bind to the promoter region of lncRNA-MEG3 (Figure S3B). We found that increased expression of lncRNA-MEG3 in response to hypoxia was markedly attenuated by siHIF1 $\alpha$  and siHIF1 $\beta$  but not by siHIF2 $\alpha$  or siHIF2 $\beta$  (Figure S3C). As a positive control, cobalt chloride (CoCl<sub>2</sub>, a known activator of HIF) evoked significant expression of lncRNA-MEG3, which was attenuated by siHIF1 $\alpha$  and alleviated by siHIF1 $\beta$  (Figure S3D). Consistently, lncRNA-MEG3 was potently induced by HIF1 $\alpha$  overexpression and moderately upregulated by HIF1 $\beta$  overexpression (Figure S3E). We also examined the role of histone acetylation in regulating lncRNA-MEG3, and results showed that hypoxia-induced lncRNA-MEG3 expression was prevented by C646 (histone acetyltransferase inhibitor) (Figure S3F). Altogether, our

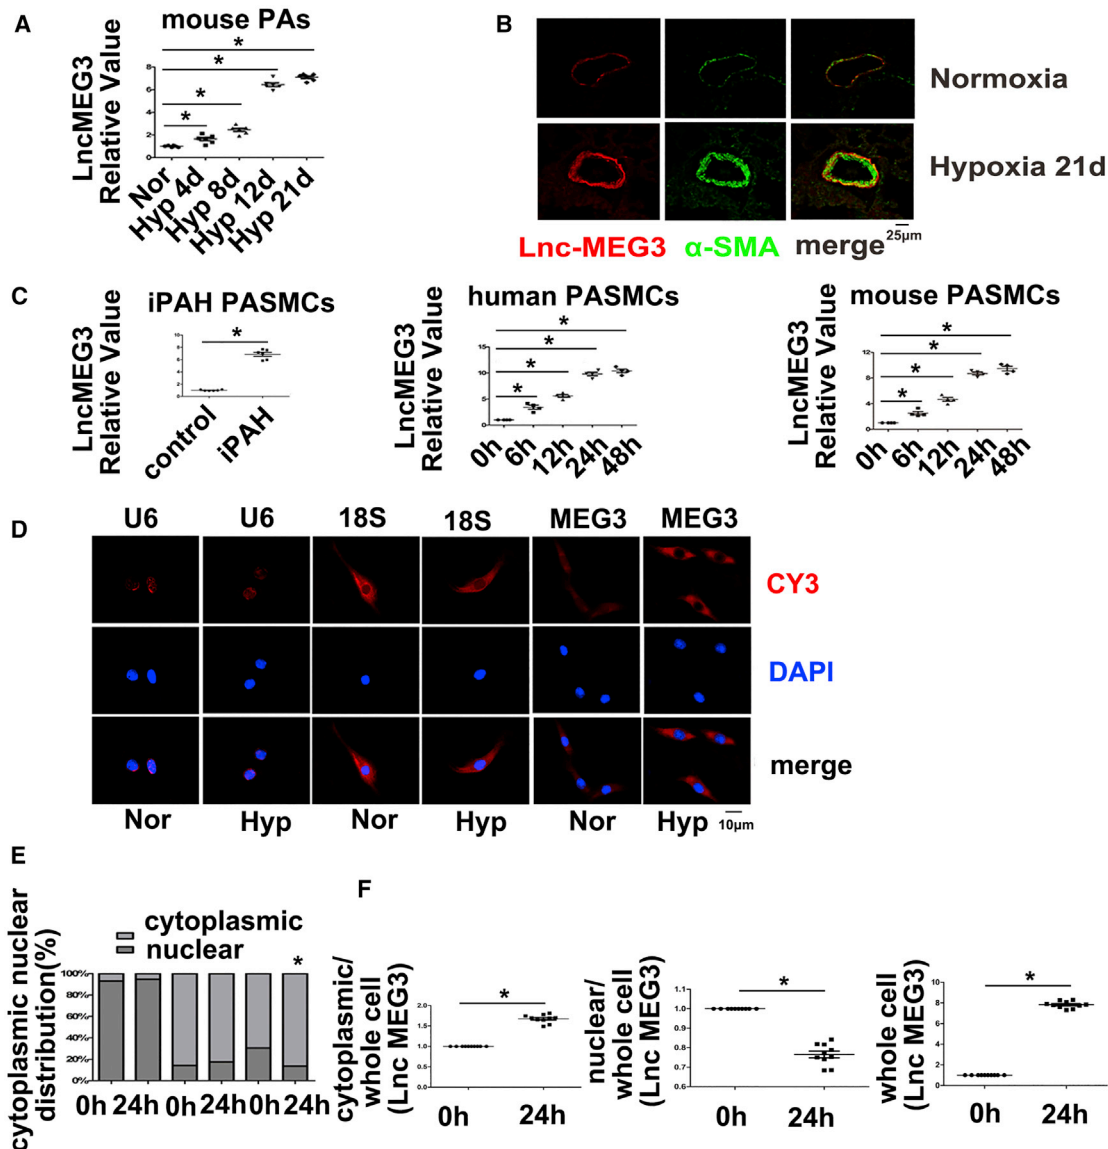

**Figure 1. Effects of Hypoxia on lncRNA-MEG3 Expression**

(A) Mice were exposed to hypoxia (10%  $\text{FIO}_2$ ) for indicated times, and lncRNA-MEG3 expression was detected by real-time PCR in isolated PAs ( $n = 6$ ). (B) FISH analysis of lncRNA-MEG3 (red) and colocalization with  $\alpha$ SMA (green) in PAs from 21-day hypoxia-exposed mice. (C) Expression of lncRNA-MEG3 was detected in PASMCs of iPAH patients and in PASMCs from human and mouse ( $n = 6$ ). (D) FISH showing the distribution lncRNA-MEG3 (red, CY3 staining) in the nucleus (blue, stained with 4,6-diamidino-2-phenylindole) and cytoplasm. (E) Quantification of FISH fluorescence signals of lncRNA-MEG3 in the nuclear and cytoplasmic fractions. U6 and 18S RNA were used as controls for localization of the nucleus and cytoplasm, respectively. The graph represents the means  $\pm$  SEM from  $>50$  cells from three independent experiments. (F) Isolation of cytoplasmic and nuclear fractions followed by real-time PCR ( $n = 4$ ). Data represent means  $\pm$  SEM from indicated independent experiments. Student's *t* test (for two means) or one-way ANOVA followed by Dunnett's test (for  $>2$  means). \* $p < 0.05$ , \*\* $p < 0.01$ .

results revealed that lncRNA-MEG3 expression is induced by hypoxia in a HIF1-dependent manner (primarily by HIF1 $\alpha$ ).

#### lncRNA-MEG3 Knockdown Prevents Increased Proliferation and Reduced Apoptosis Induced by Hypoxia

To determine whether lncRNA-MEG3 is required for increasing levels of proliferation and reducing levels of apoptosis in response

to hypoxia, we inhibited pulmonary vessel lncRNA-MEG3 using a lung-specific delivery system (R8 peptide conjugated PEG2000-lipid [R8-Lip] that modified siRNA targets to MEG3 [R8-Lip-siMEG3]) *in vivo*. R8-Lip-siMEG3 was injected into the tail vein under hypoxic conditions on days 1, 4, 7, and 14, and siRNA targeted to MEG3 without any modification (siMEG3) and R8-Lip were used as controls. R8-Lip targeting to the pulmonary smooth muscle layer was

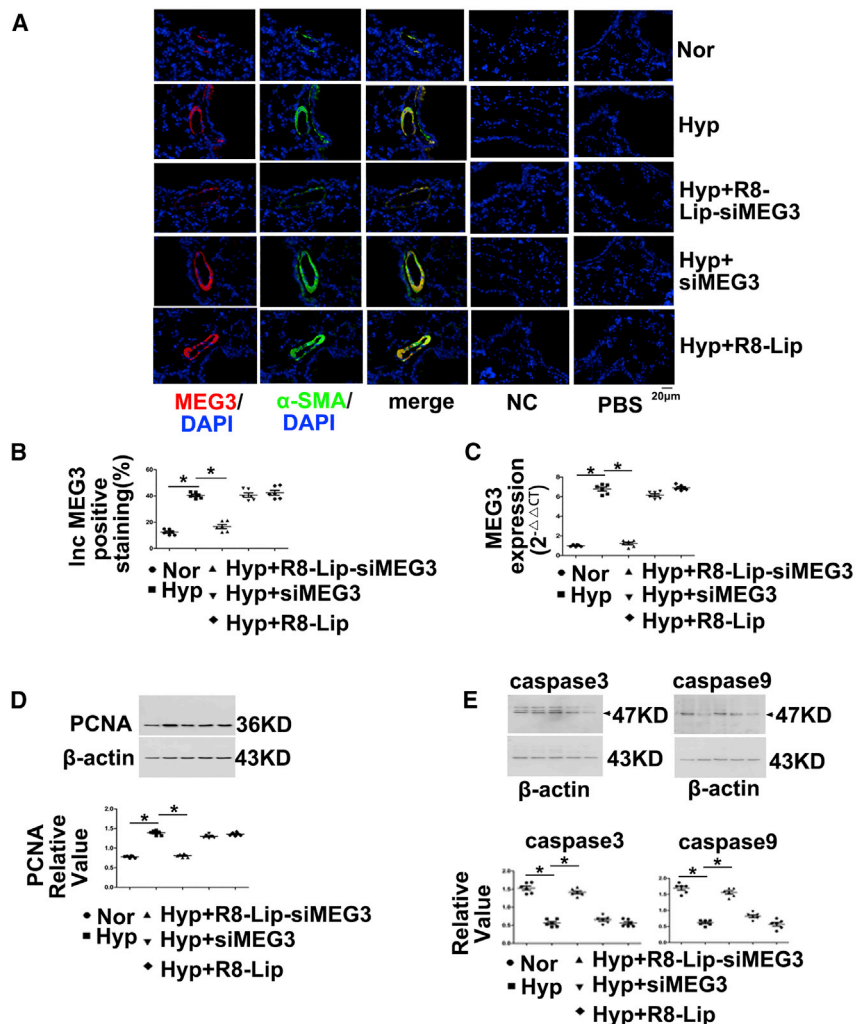

**Figure 2. Pulmonary-Specific lncRNA-MEG3 Knockdown Prevented Hypoxia-Induced Pulmonary Hypertension**

(A) Efficiency of R8-liposome-loaded siRNA targeting to lncRNA-MEG3 (R8-Lip-siMEG3) on knockdown of lncRNA-MEG3 expression was confirmed by FISH. FISH probes targeting  $\alpha$ SMA mRNA were used as positive controls, probes targeting to SUC2 gene were used as NCs, and nonprobe PBS was also used as a control. (B) Bar graph indicating lncRNA-MEG3-positive staining by FISH. (C) Real-time PCR revealed lncRNA-MEG3 in isolated PAs. (D) PCNA expression in PAs detected by western blot. (E) Caspase-3 and caspase-9 expression was detected in isolated PAs. Data represent means  $\pm$  SEM from six independent experiments. One-way ANOVA followed by Dunnett's test was used. \* $p$  < 0.05, \*\* $p$  < 0.01.

confirmed by double staining of labeled siMEG3 with  $\alpha$ SMA but was not observed between labeled siMEG3 with CD31 (Figure S4A). The cytotoxicity of R8-Lip-siMEG3 was evaluated by 3-[4,5-dimethylthiazol-2-yl]-2,5-diphenyl-tetrazolium bromide (MTT) assay (Figure S4B), which revealed that R8-Lip-siMEG3 was not cytotoxic to PASCs over 24 h. R8-Lip-siMEG3 significantly and efficiently suppressed lncRNA-MEG3 expression (red), which was confirmed by tissue FISH (Figures 2A and 2B), while siMEG3 and R8-Lip did not affect lncRNA-MEG3 expression under hypoxic conditions. FISH probes targeting  $\alpha$ SMA mRNA (green) were used as positive controls, while probes targeting the SUC2 gene served as NCs and nonprobe control (PBS), which did not generate any signals. The inhibitory effect of R8-Lip-siMEG3 on lncRNA-MEG3 expression under hypoxic conditions was further confirmed by real-time PCR (Figure 2C) in isolated PAs from the HPH mouse model. R8-Lip-siMEG3 inhibited the elevation of proliferating cell nuclear antigen (PCNA) expression (Figure 2D). We observed decreased caspase-3 and caspase-9 expression in hypoxic mice as well, and *in vivo* silencing of MEG3 using R8-Lip-siMEG3 attenuated this decreasing expression. However, neither

siMEG3 without modification nor R8-Lip control prevented the decreased apoptosis under hypoxia conditions (Figure 2E). These findings confirm that increased lncRNA-MEG3 leads to hypoxia-induced PASCs proliferation and reduces apoptosis *in vivo*.

Next, we further explored the function of lncRNA-MEG3 by knocking down its expression with siMEG3 or gapmers in cultured mPASCs. Two different siRNAs (siMEG-936 and siMEG3-1417) and gapmers targeting two different sequences were designed to knock down lncRNA-MEG3 expression. All siRNAs and gapmers efficiently inhibited lncRNA-MEG3 expression in a dose-dependent manner (Figure S5A). Because no difference was observed in the knockdown of lncRNA-MEG3 expression between the two

siRNAs, siMEG-936 was used for further *in vivo* and *in vitro* studies. siMEG3 treatment reduced lncRNA-MEG3 levels compared to scramble control RNAs (NC). Hypoxia increased cell viability in PASCs, and silencing of lncRNA-MEG3 attenuated the effects of hypoxia compared to NCs (Figure 3A, left panel). Indeed, in the analysis of PASC proliferation, hypoxia markedly enhanced bromodeoxyuridine (BrdU) incorporation (Figure 3A, right panel), PCNA expression (Figure 3B), and Ki67 staining (Figure 3C). In the presence of siMEG3, these effects were reduced nearly to baseline levels.

Next, we investigated the function of lncRNA-MEG3 in cell-cycle progression. As expected, hypoxia promoted S+G2/M phase, whereas lncRNA-MEG3 knockdown attenuated the effects of hypoxia (Figure 3D). Furthermore, knockdown of lncRNA-MEG3 prevented the increased expression of cyclin A, B, and D (Figure 3E) and coordinated the activation of important cell-cycle proteins, including cyclin-dependent kinases (CDK1, CDK2, and CDK4) (Figure 3E), which were induced by hypoxia. Moreover, we assessed the role of lncRNA-MEG3 in apoptosis. As indicated by the expression of



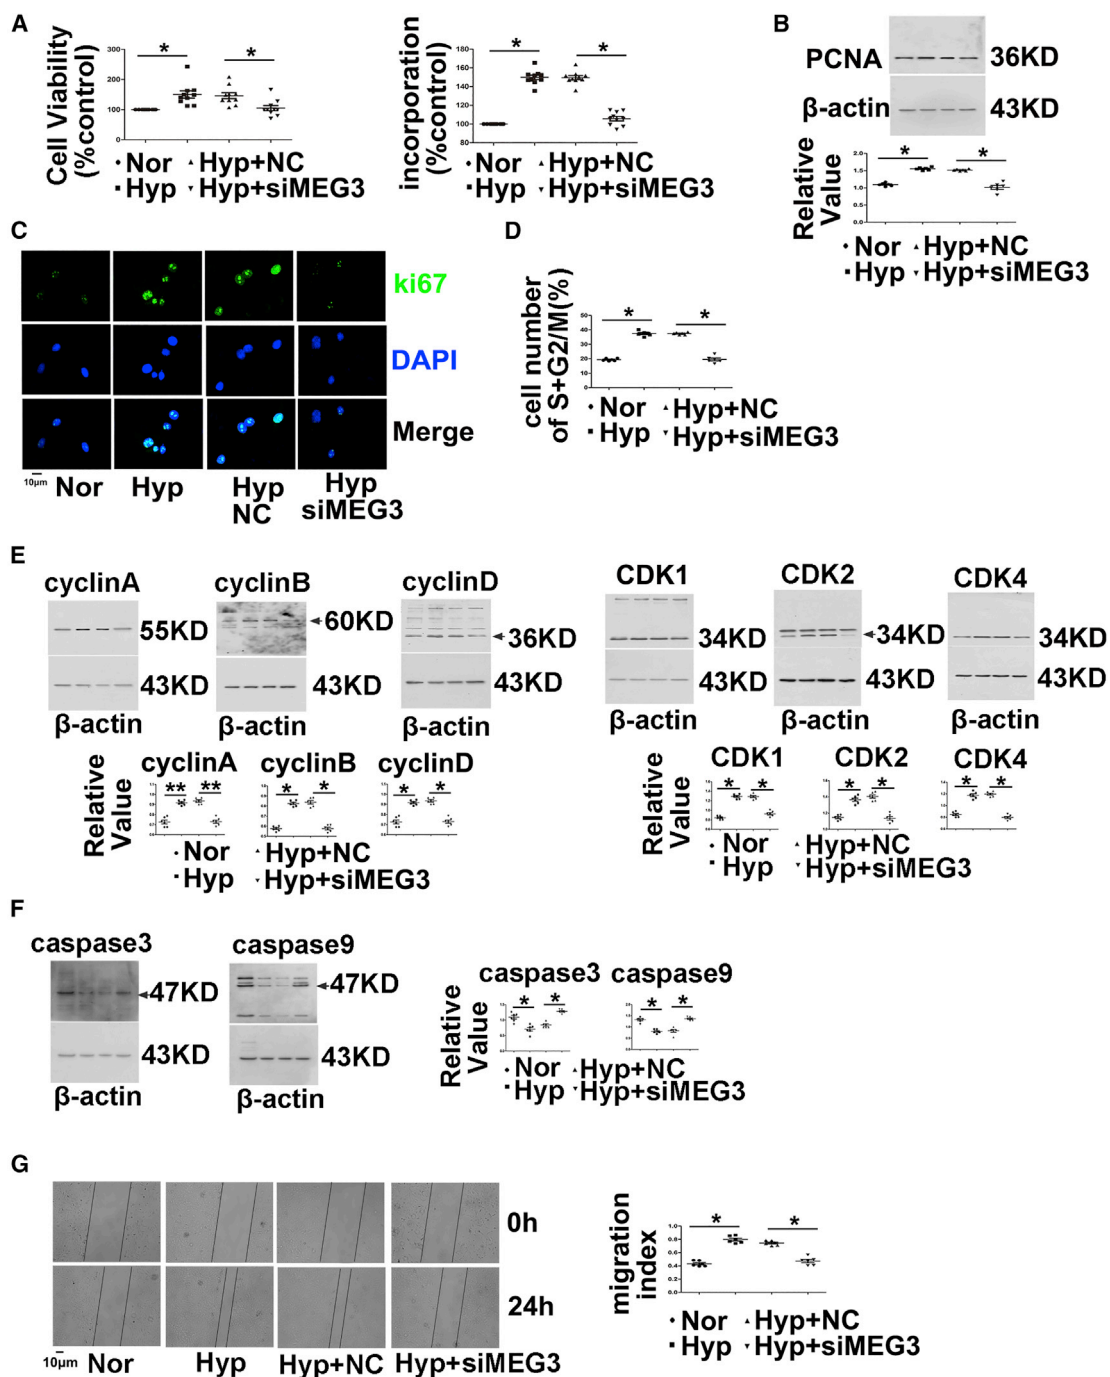

**Figure 3. MEG3 Is Involved in Hypoxia-Induced PASMC Proliferation, Cell-Cycle Progression, and Cellular Migration**

(A) Cell viability determined by MTT (left panel) and BrdU incorporation (right panel) of PASMCs transfected with siRNA targeting lncRNA-MEG3 (siMEG3) or NC nucleotide, followed by exposure to hypoxia for 24 h. (B) PCNA expression determined by western blot, and (C) Ki67 staining performed by immunofluorescence. (D) Flow cytometry analyzed cell-cycle progression. (E) Cyclins and CDKs and (F) caspase-3 and caspase-9 expression was detected by western blot. (G) Cellular migration experiment. PCNA represents proliferating cell nuclear antigen. CDK represents cyclin-dependent kinases. Data represent means  $\pm$  SEM from at least six independent experiments. One-way ANOVA followed by Dunnett's test was used. \* $p < 0.05$ , \*\* $p < 0.01$ .

caspase-3 and caspase-9 (Figure 3F), lncRNA-MEG3 knockdown increased cellular apoptosis under hypoxia conditions. Furthermore, knockdown of lncRNA-MEG3 by siRNA inhibited hypoxia-induced cell migration (Figure 3G). Gappers of lncRNA-MEGs displayed similar effects in preventing cell proliferation, cell-cycle progression, and cellular migration induced by hypoxia (Figures S5B–S5F).

It is well recognized that iPAH-PASMCs exhibit a “cancer-like” hyperproliferative and apoptosis-resistant phenotype when cultured *in vitro*. We examined the role of lncRNA-MEG3 knockdown in cultured iPAH-PASMCs. We observed reduced cell viability, PCNA expression, and cyclin expression and increased expression of caspases, as well as resistance to migration after MEG3 knockdown in iPAH-PASMCs (Figure S6). These data suggest that lncRNA-MEG3 knockdown prevents hyperproliferation and reduced apoptosis phenotype of iPAH-PASMCs.

To confirm the function of lncRNA-MEG3 in hypoxia-induced proliferation and cell-cycle progression in PASMCs, we overexpressed one segment of lncRNA-MEG3 (mouse transcript varies 1, nt 1563–3207, 1644 bp, Figure 5A) using a lentiviral vector. As shown in Figure 4, overexpression of lncRNA-MEG3 increased cell proliferation (as measured by cell viability, BrdU incorporation, PCNA expression, and Ki67 staining), cell-cycle progression (as measured by flow cytometry, cyclins, and CDKs expression), and cell migration in the absence of hypoxia. Taken together, these results suggest that lncRNA-MEG3 is involved in hypoxia-induced PASMC proliferation, cell-cycle progression, cell migration, and reduced apoptosis in PASMCs.

#### Association of lncRNA-MEG3 with miRNA-328-3p

To understand the molecular mechanism by which lncRNA-MEG3 regulates hypoxia-induced PASMC proliferation and cell-cycle progression, we used computational approaches to assess the binding propensity of lncRNA-miRNAs. This analysis identified seven potential lncRNA-MEG3-interacting miRNAs, including miR-21, miR-30c, miR-138, miR-145, miR-328-3p, miR-1906-1, and miR-770 (Figure 5A, left panel; Figure S7A). To confirm the relationship between these miRNAs and lncRNA-MEG3, we assessed the expression of these miRNAs under hypoxic conditions with and without lncRNA-MEG3 knockdown, observing that expression of miR-30c and miR-328-3p were inhibited, whereas those of miR-138, miR-145, and miR-21 were increased (Figure 5A; Figure S7B) by hypoxia. However, among these miRNAs, we focused on miR-328-3p because a previous study indicated that miR-328-3p may play an important role in HPH.<sup>6</sup> Results indicated that miR-328-3p is regulated by lncRNA-MEG3, as knockdown of lncRNA-MEG3 reversed the downregulation of miR-328-3p under hypoxic conditions (Figure 5B; Figure S7C). Furthermore, real-time PCR revealed that miR-328-3p was decreased in PAs under hypoxic conditions in a time-dependent manner (Figure S7C), and lung-specific knockdown of lncRNA-MEG3 by R8-Lip-siMEG3 rescued this downregulation, while si-MEG3 without modification or R8-Lip control showed no effects (Figure 5C). To determine whether the relationship between

lncRNA-MEG3 and miR-328-3p is applicable in other models of PH, we used SUGEN-hypoxia mouse models and iPAH-PASMCs. Results revealed that lncRNA-MEG3 was increased but miR-328-3p was decreased in PAs from SUGEN-hypoxia mouse models (Figure 5D) and in iPAH-PASMCs (Figure 5D). Using a computational approach, we found that nt 2071–2094 of lncRNA-MEG3 may directly bind to miR-328-3p (Figure 5A). To confirm this hypothesis, we cloned the putative miR-328-3p target-binding sequence into a luciferase construct, and results showed that miR-328-3p repressed and AMO-328 (inhibitor nucleotide of miR-328-3p) increased luciferase activity (Figure 5E, left panel). Mutation in the putative miR-328-3p binding site (marked in bold in Figure 5A) decreased the response to miR-328-3p (Figure 5E, right panel). In addition, we used MicroScale thermophoresis (MST) to analyze the interaction between lncRNA-MEG3 and miR-328-3p. The results indicated that miR-328-3p mimics binding with lncRNA-MEG3 (nt 2030–2193, Figure 5A) with a  $K_d$  of  $7.46 \pm 0.166 \mu\text{M}$ . As controls, a nonbinding mutant miR-328-3p ( $K_d$  of  $3940 \pm 46 \mu\text{M}$ ) and an IGF1R mRNA sequence were used ( $K_d$  of  $10.24 \pm 0.298 \mu\text{M}$ ) (Figure 5F). Furthermore, RNA immunoprecipitation using biotin labeled MEG3 followed by biotin pulldown and miR-328-3p expression was determined by real-time PCR. miR-328-3p expression was detected in the biotin group and input group, but not in the immunoglobulin G (IgG) control group, indicating direct binding between MEG3 and miR-328-3p (Figure 5G, left panel). Moreover, we found binding of MEG3 with miR-328-3p was increased in iPAH-PASMCs (Figure 5G, right panel). These results indicate that lncRNA-MEG3 directly binds to miR-328-3p in a sequence-specific manner and up-regulation of lncRNA-MEG3 decreases the expression of miR-328-3p *in vivo* and *in vitro* under hypoxia conditions.

#### lncRNA-MEG3 Functions through Its Association with miR-328-3p

To investigate the interplay of lncRNA-MEG3 and miR-328-3p on hypoxia-induced cell proliferation and cell-cycle progression, we used miR-328-3p mimics or an inhibitor (AMO-328) to examine the role of lncRNA-MEG3 knockdown on hypoxia-induced biological processes. Both increasing the expression of endogenous miR-328-3p by knockdown of lncRNA-MEG3 and applying exogenous miR-328-3p mimics reversed the increased cell viability (Figure 6A, left panel), BrdU incorporation (Figure 6B, right panel), PCNA expression (Figure 6B), and Ki67 staining (Figure 6C), as well as accelerated the cell cycle into the S+G2/M phase (Figure 6D), and increased the expression of cyclins A, B, and D (Figure 6D) and CDK1, CDK2, and CDK4 (Figure 6D) induced by hypoxia. Application of AMO-328 (which disrupts the binding of miR-328-3p with its targets) reversed the effects of lncRNA-MEG3 knockdown and miR-328-3p mimics, whereas application of miR-328-3p mimics during lncRNA-MEG3 knockdown had no additional effects. Our previous study showed that miR-328-3p is involved in HPH by regulating the expression of IGF1R.<sup>6</sup> Computational approaches indicated the binding propensity of miR-328-3p with IGF1R mRNA. We also observed that IGF1R mRNA and protein (Figure 6E) expression was upregulated in iPAH-PASMCs. Next, we detected IGF1R

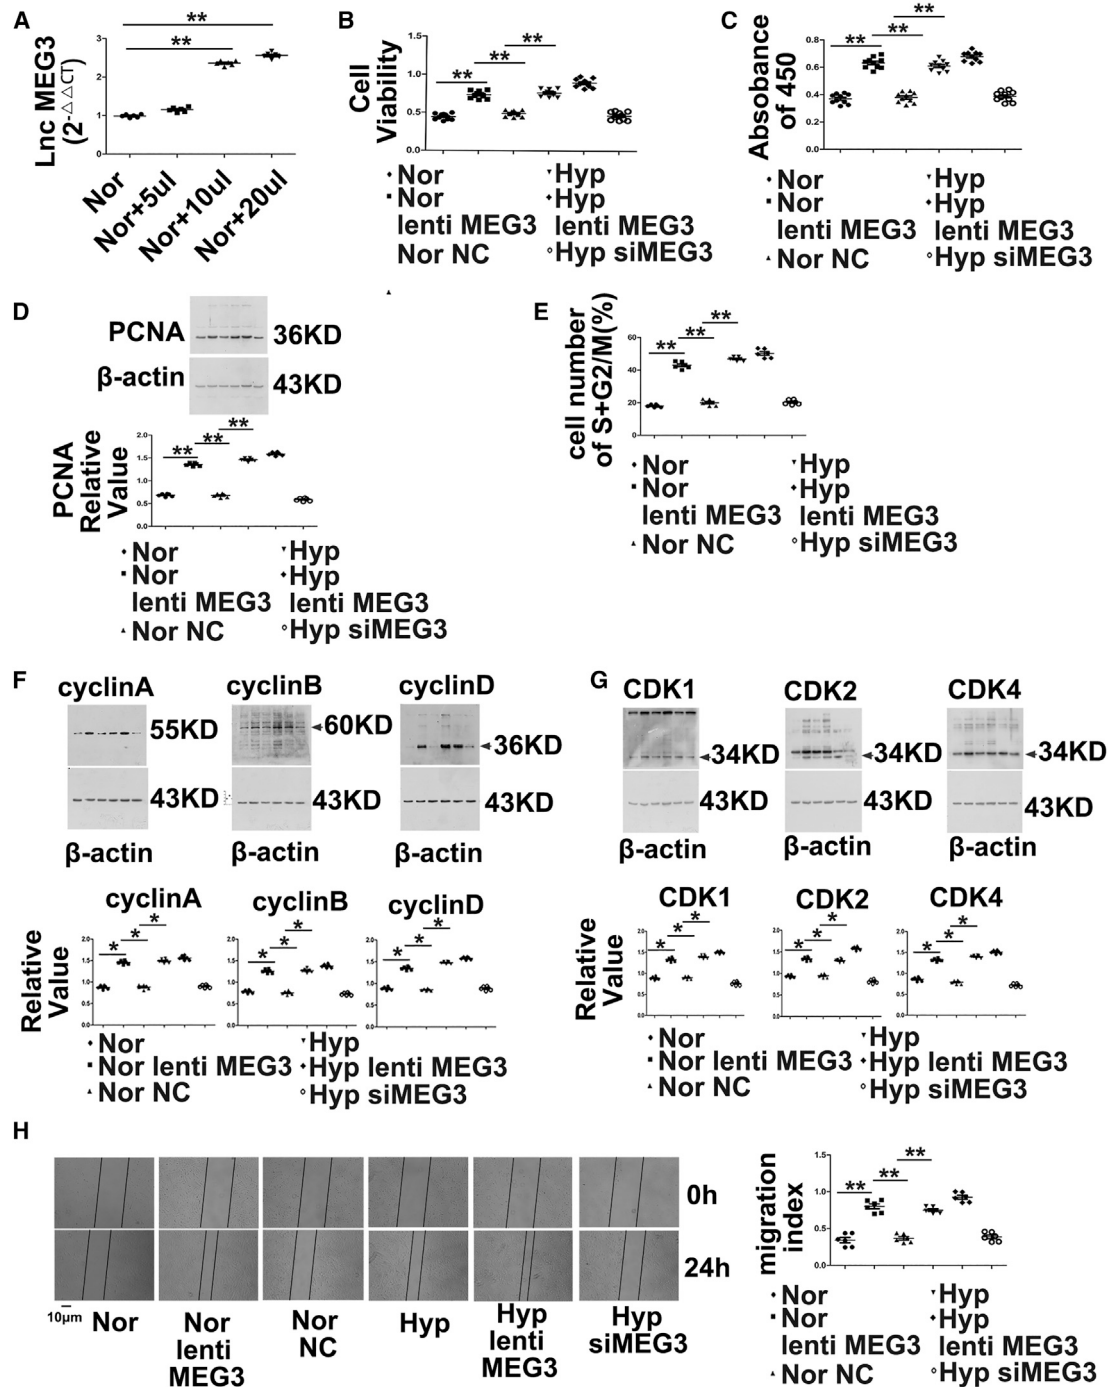

**Figure 4. Overexpression of MEG3 Induces PSMC Proliferation, Cell-Cycle Progression, and Cellular Migration**

(A) One segment of lncRNA-MEG3 (mouse transcript varies 1, nt 1563–3207, 1644 bp) was amplified by real-time PCR, and then inserted into lentiviral vectors. Expression of lncRNA-MEG3 in mPSMCs after transfection with different doses of plasmid. (B) Cell viability determined by MTT. (C) BrdU incorporation. (D) PCNA expression detected by western blot. (E) Cell-cycle progression detected by flow cytometry. (F) Cyclin expression and (G) CDK expression detected by western blot. (F) Cellular migration. Data represent means  $\pm$  SEM from four independent experiments. One-way ANOVA followed by Dunnett's test was used. \* $p < 0.05$ , \*\* $p < 0.01$ .

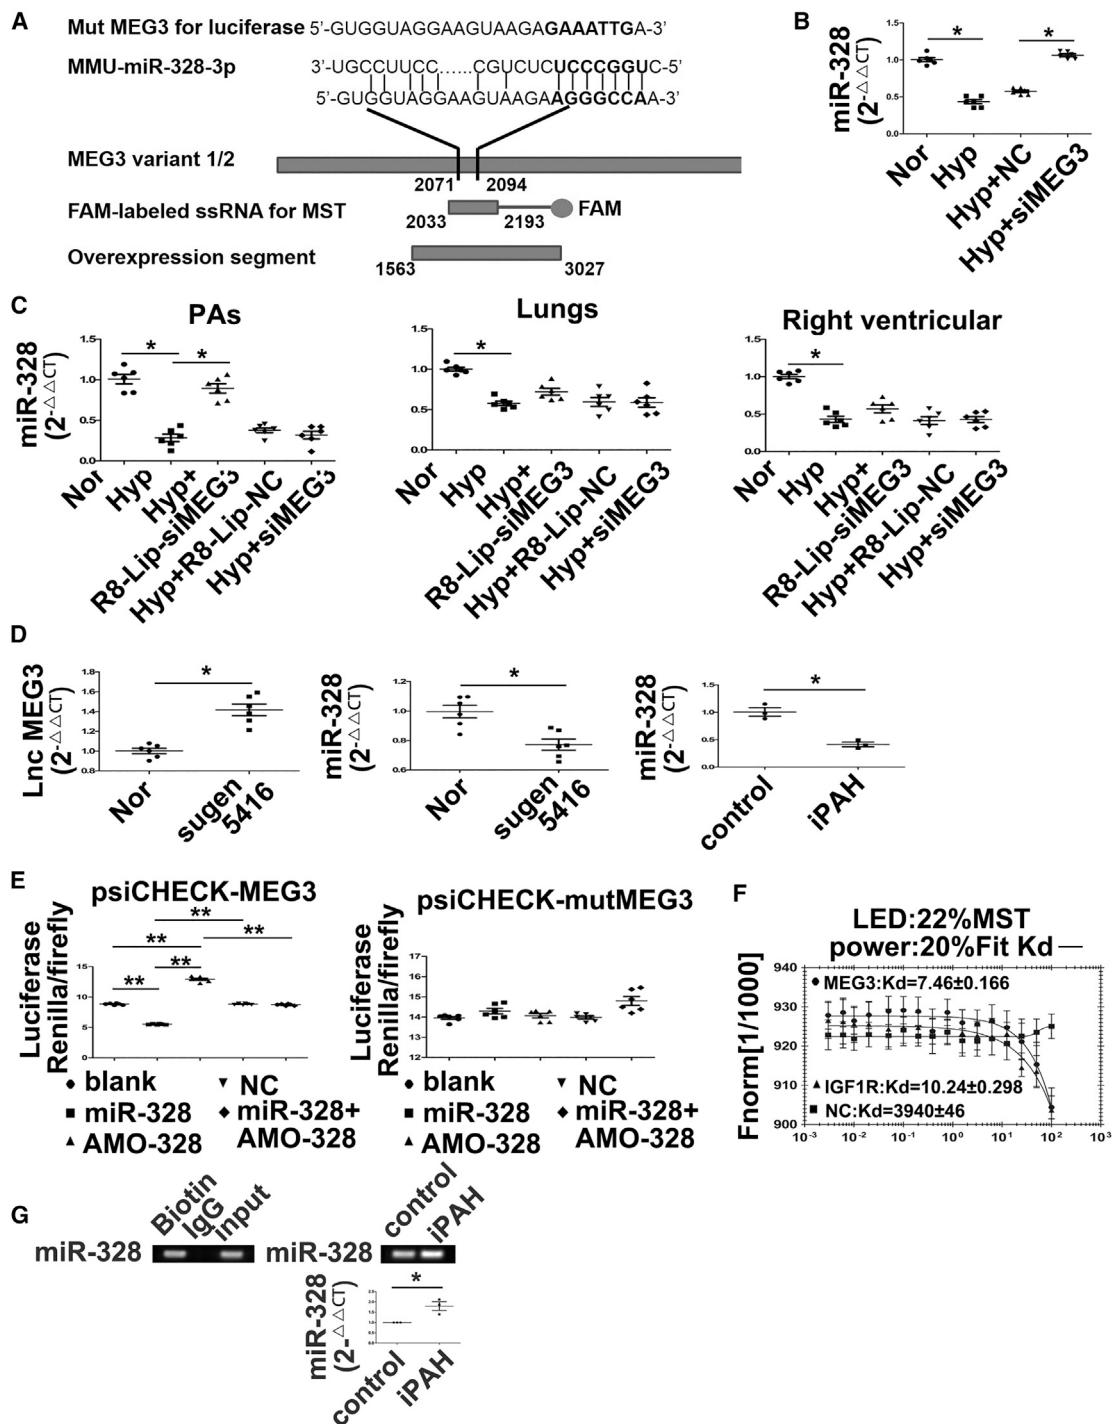

**Figure 5. IncRNA-MEG3 Binds to and Decreases the Expression of miR-328-3p**

(A) Diagram showing the genomic structure of the relative oligos, miR-328-3p binding sequences, mutation sequence used for luciferase experiments, PCR product for MST, and overexpression segment (left panel). miR-328-3p expression detected by real-time PCR in mPASCs transiently transfected with 30 nM NC siRNA or siRNA against MEG3 (siMEG3), followed by hypoxia for 24 h (right panel). (B) Detection of miR-328-3p expression in PAs, lung, and right ventricular from hypoxia PH mouse. (C) Detection of lncRNA-MEG3 (left panel) and miR-328-3p (right panel) expression in PAs from SUGEN-hypoxia mouse models. (D) Expression of miR-328-3p was detected in iPAH-PASCs (n = 3). (E) mPASCs were transiently transfected with the indicated agents, followed by transient transfection with 25 ng of psiCHECK plasmid harboring the lncRNA-MEG3 binding region (nt 2071–2094) (left panel) or mutated sequence (right panel). Luciferase activity was assessed 36 h after transfection and normalized to the

(legend continued on next page)



expression in mPASCs. As shown in Figure 6F, the knockdown of lncRNA-MEG3 by siMEG3, application of miR-328-3p mimics, or siMEG3 plus miR-328-3p mimics inhibited the increased expression of IGF1R mRNA and protein levels in response to hypoxic conditions. Disruption of miR-328-3p binding with AMO-328 reversed the inhibitory effects of siMEG3.

Moreover, we examined whether anti-miR-328-3p therapy *in vivo* could reverse the pulmonary vascular remodeling effects of lncRNA-MEG3 knockdown by injecting AMO-328. The data showed that lung-specific lncRNA-MEG3 knockdown by R8-Lip-siMEG3 prevented increases in Ki67 expression (Figure 7A) and decreased RVSP (Figure 7B), RV/LV+S (Figure 7C), cardiac output, mean pulmonary artery pressure (mPAP), and total pulmonary vascular resistance (PVR) (Figure 7D). Fibrosis and increasing percentage of medial wall thickness to the external diameter accessed by Masson trichrome staining (Figure 7E) was induced by hypoxia, whereas siMEG3 and R8-Lip did not show significant inhibitory effects. Furthermore, upregulation of IGF1R (Figure 7F; Figure S8A) and PIM1 (Figure S9) in PAs from HPH mouse models were prevented by R8-Lip-siMEG3, which was rescued by AMO-328. Right ventricular function was examined in our *in vivo* study, and hypoxia induced IG1R mRNA and protein expression (Figure S8B), cardiomyocyte hypertrophy (Figure S8C), collagen deposition (Figure S8D), and fibrosis (Figure S8E), reduced apoptosis (Figure S8F), and increased microvessel density (Figure S8G), which was expressed as a proportion of CD31<sup>+</sup> cells measured in the whole section, as suggested by Potus et al.<sup>27</sup> All of these effects were significantly attenuated by lung-specific MEG3 knockdown, and anti-miR-328-3p therapy by AMO-328 significantly reversed the effects of R8-Lip-siMEG3.

To assess the beneficial effect of R8-Lip-siMEG3 once PH was established, we exposed mice to hypoxia for 2 weeks to establish PAH, and R8-Lip-siMEG3 was subsequently injected through the tail vein for another 3 weeks. R8-Lip and siMEG3 without modification served as controls. To confirm that lung-specific MEG3 knockdown was dependent on miR-328-3p, we injected anti-miR-328-3p therapy with AMO-328 in the R8-Lip-siMEG3 group. We found that hypoxia-induced PH was reversed by R8-Lip-siMEG3. Moreover, anti-miR-328-3p therapy completely prevented the increase in muscularization of PAs as detected by Masson trichrome staining (Figure S10A) and by measurement of RVSP (Figure S10B), RV/LV+S (Figure S10C), cardiac output (Figure S10D), mPAP (Figure S10E), and total PVR (Figure S10F). These data indicate that lung-specific delivery of R8-Lip-siMEG3 was able to reverse hypoxia-induced PH.

Together, these results demonstrate that lncRNA-MEG3 binds to and sequesters miR-328-3p, eventually increasing downstream target gene IGF1R expression to regulate cell proliferation, cell-cycle

progression, cellular migration, and apoptosis during HPH development.

## DISCUSSION

In the present study, we identified lncRNA-MEG3 as a key regulator of HPH that interacts with miR-328-3p. We showed that lncRNA-MEG3 was upregulated in response to hypoxia and was involved in hypoxia-induced PASC proliferation and cell-cycle progression. Mechanistically, lncRNA-MEG3 directly binds to miR-328-3p using nt 2071–2094. Upregulation of lncRNA-MEG3 sequesters miR-328-3p, leading to increased expression of IGF1R and regulating the development of HPH. This finding implicates lncRNAs in HPH and suggests that modulation of lncRNA-MEG3 activity and its downstream targets, such as miR-328-3p, is a novel therapeutic approach for treating this fatal disease.

The most important finding of our study was that lncRNA-MEG3, upregulated by hypoxia, is involved in hypoxia-induced PASC proliferation. Although the majority of previous studies showed that overexpression of lncRNA-MEG3 suppresses cell proliferation in multiple cancer cell lines,<sup>23–25</sup> our data showed that upregulation of lncRNA-MEG3 is involved in hypoxia-induced PASC proliferation. Knockdown of lncRNA-MEG3 expression reversed hypoxia-induced RVSP and the RV/LV+S weight ratio. We also showed that silencing lncRNA-MEG3 attenuated hypoxia-induced PASC proliferation in PAs, which was confirmed by PCNA expression and Ki67 staining. Through knockdown of lncRNA-MEG3 in cultured PASCs, we further showed that hypoxia-induced PASC proliferation and cell-cycle progression occurred in a lncRNA-MEG3-dependent manner. Finally, lncRNA-MEG3 was increased in iPAH-PASCs and in SUGEN-hypoxia models. Together, these results indicate that lncRNA-MEG3 plays an important role in the development of pulmonary hypertension.

Previous studies have indicated that downregulation of lncRNA-MEG3 is correlated with hypoxic microenvironment-related cancer metastasis or recurrence,<sup>22–25</sup> depending on the tissue- and/or cell type.<sup>28</sup> Specifically, lncRNA-MEG3 was downregulated in human PASCs under hypoxic conditions.<sup>29,30</sup> One possible reason for these distinct results compared with our observations could be due to the different genetic background of PASCs and culture system (i.e., cultured medium) used in these experiments. Another possibility could be the different transcript variants of MEG3 detected by specifically designed primers, because there are 15 transcript variants (1–10, 12–16) of *Homo sapiens* MEG3. We using primers designed based on the conserved region of all the 15 transcript variants in human PASCs. Northern blotting can be used to clarify the specific transcript variants of MEG3 underlying these opposing results. Furthermore, using an HPH mouse model and *in vitro* cultured cells,

activity of Renilla luciferase. (F) MST analysis indicated that miR-328-3p mimics interaction with lncRNA-MEG3 (2030–2193, 163-nt PCR product), IGF1R, and NC nucleotide. (G) RNA immunoprecipitation by biotin-labeled MEG3 segment (nt 2030–2193) was subjected to pulldown, following real time-PCR to detect miR-328-3p expression. Data represent means  $\pm$  SEM from six (except where indicated) independent experiments. Student's t test (for two means) or one-way ANOVA followed by Dunnett's test (for >2 means). \* $p < 0.05$ , \*\* $p < 0.01$ .

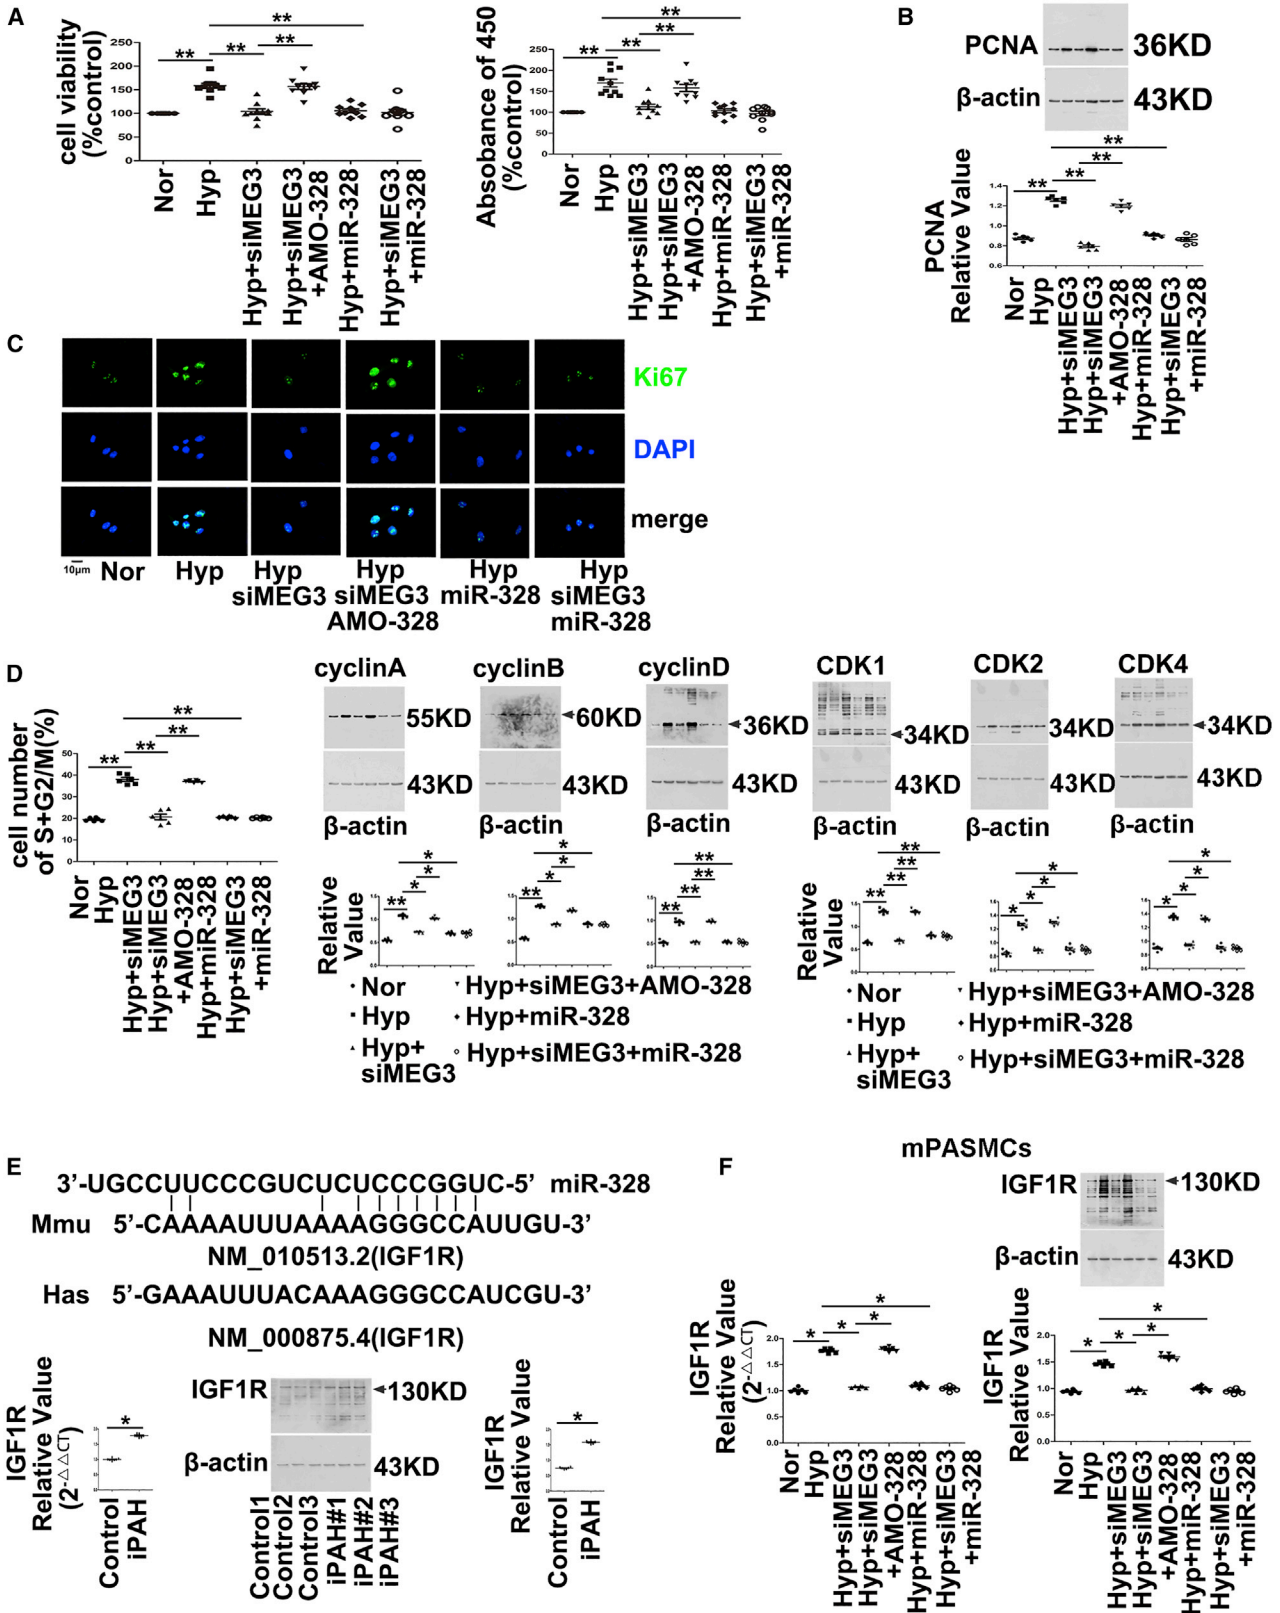

(legend on next page)

we observed that lncRNA-MEG3 expression was specifically increased by hypoxia in PSMCs, while downregulation of lncRNA-MEG3 expression in all other tissues was detected, even in lung tissue (Figure S2). We think this could be due to the tissue- and/or cell-specific expression pattern of MEG3. For example, even in endothelial cells, MEG3 was significantly lower in arterial compared to venous or microvascular endothelial cells. Similarly, another lncRNA, MALAT1, is highly expressed in the lung microvasculature compared to the cardiac microvasculature. Our results differed from reports of other diseases, suggesting that the expression of lncRNA-MEG3 induced by hypoxia is specifically elevated in PSMCs and that upregulation of lncRNA-MEG3 contributes to PSMC proliferation and cell-cycle progression. In addition to tissue-specific distribution, our study also showed that lncRNA-MEG3 was primarily localized to the cytoplasm in PSMCs. These results are consistent with those of a previous study showing that lncRNA-MEG3 retains its cytoplasmic subcellular localization in otocyst cells undergoing proliferation.<sup>21</sup> These results suggest that the effect of lncRNA-MEG3 on PSMC proliferation is not related to the cellular localization of lncRNA-MEG3 in pulmonary hypertension but rather is dependent on the expression of lncRNA-MEG3. Based on our experimental results, lncRNA-MEG3 was only increased by hypoxia in PSMCs, and this alternative mechanism of PSMC proliferation by lncRNA-MEG3 greatly differs from those in other diseases, even in hypoxic microenvironment-related diseases. The specific effect of lncRNA-MEG3 on PSMCs may depend on lung vascular responses to hypoxia. Further studies are needed to evaluate these alternative effects among PSMCs and other tumor cell lines.

We observed an increase in lncRNA-MEG3 expression in hypoxic PAs and PSMCs. The precise factors regulating lncRNA-MEG3 expression in response to hypoxia remain unclear. A previous study indicated that the regulation of lncRNA-MEG3 by miR-29a was methylation dependent.<sup>23</sup> Cyclic AMP stimulates MEG3 gene expression in cells through a cyclic AMP-response element site in the promoter region,<sup>31</sup> suggesting that an alternative regulatory pathway functions in PSMCs during hypoxia. By analyzing the promoter of lncRNA-MEG3, we found there are multiple binding sites for transcription factors, such as NFAT2, STAT3, and HIF. Our data indicated that lncRNA-MEG3 was induced by hypoxia in a HIF1-dependent manner (primarily HIF1 $\alpha$ ) (Figure S3). The role of HIF in oxygen-dependent regulation of lncRNA-MEG3 *in vivo* remains to be elucidated. lncRNA-MEG3 expression was only induced in PAs but not in other organs, which may be a lung-system-specific response to hypoxia. For example, the pulmonary artery contracts while systemic

vasculature dilates in response to hypoxia. Indeed, whether other transcription factors and epigenetic regulatory factors, such as DNA methylation or histone acetylation, are involved in manipulating lncRNA-MEG3 expression during hypoxic conditions in PSMCs requires further analysis. Moreover, lncRNA-MEG3 is a sexually dimorphic gene, showing significant female bias with expression 1.36-fold higher expression in the female cortex and hippocampus than in males.<sup>32</sup> Whether the response of lncRNA-MEG3 to hypoxia varies between females and males, and such sex-dependent expression in HPH, cannot be excluded and therefore will be pursued in future studies.

Previous studies by our lab and others have demonstrated that miR-328-3p is downregulated in PAs from experimental animals under hypoxic conditions and in PAH patients and overexpressing miR-328 remarkably attenuated hypoxia-increased RVSP and PA wall thickness.<sup>6,7</sup> These results suggest a critical role for miR-328 in the development of pulmonary hypertension. The mechanism of miR-328 might be through regulating the expression of IGF1R, L-type calcium channel- $\alpha$  1C, and PIM1. We assessed the expression of IGF1R both in *in vivo* and *in vitro*. The increased expression of IGF1R in pulmonary vessels and right ventricular induced by hypoxia was inhibited by lncRNA-MEG3 knockdown, and anti-miR-328 therapy restored IGF1R expression. Moreover, alteration of IGF1R, cardiomyocyte hypertrophy, collagen deposition, fibrosis, reduced apoptosis, and increasing microvessel density (Figure S8) occurred simultaneously. These results, combined with others,<sup>33</sup> indicate the important role of IGF1R in pulmonary remodeling and right ventricular failure in HPH. PIM1 expression was also detected in pulmonary vessels, and results suggested regulatory effects of lncRNA-MEG3/miR-328-3p on PIM1 expression. Because PIM1 is critical for vascular remodeling,<sup>34,35</sup> we consider that lncRNA-MEG3/miR-328-3p may modulate multiple targets during the development of HPH.

The interaction between lncRNAs and miRNAs has been shown to play important roles in diverse biological processes. With respect to the clinical utility of miRNAs in the diagnostic and therapeutic aspects of PAH, the objective of the present study was to provide greater insight into the pervasive roles of lncRNAs in the regulation of miR-328-3p expression. Notably, we showed that lncRNA-MEG3 uses nt 2071–2094 to bind miR-328-3p, leading to downregulation of miR-328-3p. This was confirmed by the following findings: first, hypoxia inhibited miR-328-3p expression, which was attenuated by lncRNA-MEG3 knockdown; second, the luciferase reporter assay indicated that lncRNA-MEG3 binds to miR-328-3p in a

#### Figure 6. lncRNA-MEG3/miR-328-3p Regulates IGF1R Expression

(A) Mouse PSMCs were transiently transfected with indicated agents, followed by exposure to hypoxia for 24 h. Cell viability determined by MTT (left panel) and BrdU incorporation (right panel). (B) PCNA expression examined by immunoblotting. (C) Ki67 staining performed by immunofluorescence. (D) Cell-cycle progression detected by flow cytometry (left panel), cyclin expression (middle panel), CDK expression (right panel) detected by western blot. (E) Binding propensity between miR-328-3p and IGF1R mRNA (top panel). Real-time PCR (lower left panel) and western blot (lower right panel) revealed expression of IGF1R in iPAH-PSMCs of patients (n = 3). (F) AMO-328 (miR-328-3p-specific 2-O-methyl antisense inhibitory oligonucleotide) reversed the effects of lncRNA-MEG3 knockdown on IGF1R expression in cultured mPSMCs. Student's t test (for two means) or one-way ANOVA followed by Dunnett's test (for >2 means). \*p < 0.05, \*\*p < 0.01.

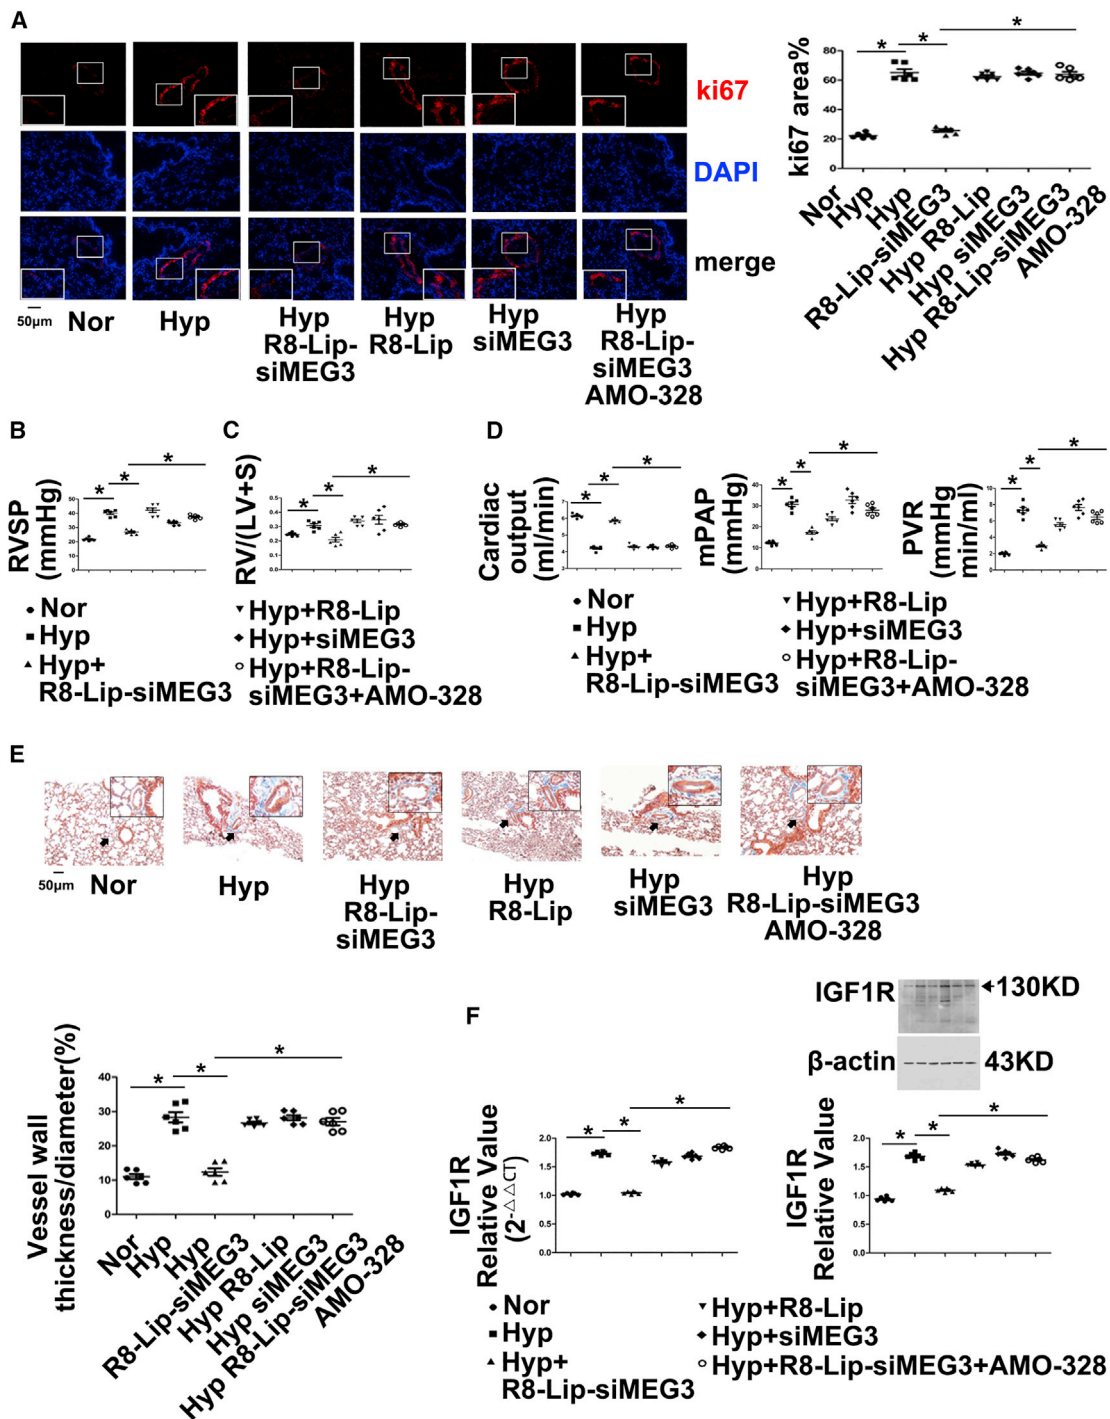

**Figure 7. IncRNA-MEG3/miR-328-3p Regulates Hypoxia-Induced Pulmonary Artery Hypertension**

(A) Immunohistochemistry of Ki67 expression. (B) RVSP was measured by right heart catheter. (C) RV/LV+S. (D) Cardiac output (CO, left panel) and mean pulmonary artery pressure (mPAP, middle panel) measured by ultrasound, total pulmonary vascular resistance, which was calculated as the ratio of mean pulmonary arterial pressure to cardiac output (right panel). (E) Masson trichrome staining. (F) IGF1R expression in isolated PAs was detected by real-time PCR and western blot. For histology section data, a minimum of 10 resistance PAs (<100 µm external diameter) were analyzed per animal. Data represent means ± SEM from six (except where indicated) independent experiments. Student's t test (for two means) or one-way ANOVA followed by Dunnett's test (for >2 means). \*p < 0.05, \*\*p < 0.01.



sequence-specific manner; third, MST results confirmed the interaction of lncRNA-MEG3 with miR-328-3p; fourth, knockdown of lncRNA-MEG3 inhibited the expression of IGF1R and PIM1 (miR-328-3p-regulated genes); and finally, increased lncRNA-MEG3, decreased miR-328-3p, and increased IGF1R were observed in iPAH-PASMCs. Although we excluded four other miRNAs displaying high binding propensity with lncRNA-MEG3, miR-1906-1 and miR-770 were also regulated by lncRNA-MEG3, and it would be interesting to determine whether miR-1906-1, miR-770, and/or other miRNAs or proteins plays important roles in the proliferation and migration of PASMCs. Specifically, why such an interaction would lead to degradation of miR-328-3p is still unknown. One possible reason may be cytoplasmic retention or degradation by RNase H. lncRNA-MEG3 is known to affect the p53 and transforming growth factor  $\beta$  pathways,<sup>36</sup> so it is important to determine whether this association is involved in PASMC proliferation under hypoxic conditions. MEG3<sup>-/-</sup> mice would help to confirm the role of MEG3 in the development of HPH.

The delivery system of R8-modified liposomes has shown potential as a pulmonary drug delivery system for PAH treatment.<sup>37</sup> We modified this lung-specific delivery system using siRNA-loaded liposomes (R8-Lip-siMEG3) and found that the biodistribution of R8-Lip in the lungs reached high levels within 1 h, which were maintained for 24 h. Thus, we repeated this application of R8-Lip-siMEG3 during hypoxia treatment. Real-time PCR and FISH confirmed the knockdown efficiency of this approach, whereas nonmodified siRNA and R8-Lip showed no significant effects (Figures 2A and 2B). Moreover, RVSP and RV/LV+S indirectly indicated the efficiency of R8-Lip-siMEG3 in preventing increased pulmonary artery pressure (Figures 2C and 2D). Therefore, using R8-Lip-siMEG3 for knockdown of lung lncRNA-MEG3 expression may provide a foundation for designing new mechanism-based therapies for HPH.

In summary, the present study revealed the involvement of lncRNA-MEG3 in HPH, which functions as a molecular sponge for miR-328-3p. Through additional studies of how lncRNAs function in various diseases,<sup>38</sup> lncRNAs may become new pharmaceutical targets and treatment targets for hypoxia-induced pulmonary hypertension.

## MATERIALS AND METHODS

Hemodynamic assessment, histological and morphometric analyses, cell culture, RNA isolation and real-time PCR, protein preparation and western blot analysis, immunofluorescence assay, cell-cycle progression analysis, cell viability assay, and BrdU assay are described in the [Supplemental Information](#).

### Animal Model of Pulmonary Hypertension and Tissue Preparation

Adult male C57BL/6 mice (mean weight 30 g) were obtained from the Experimental Animal Center of Harbin Medical University, which is accredited by the Institutional Animal Care and Use Committee. This animal study was approved by the ethics review board of Harbin Medical University ([2012]-006). Study design attempted to follow

the guideline for preclinical study of pulmonary hypertension by Provencher et al.,<sup>39</sup> including but not limited to two PH models, invasive hemodynamic assessment, image-based data, randomization, and blinded assessment of standardized outcomes. Mice were randomized for exposure for the indicated times to normal and hypoxic environments with FiO<sub>2</sub> levels of 0.21 and 0.12, respectively. After the indicated hypoxia exposure period, mice were anesthetized with chloral hydrate (40 mg/kg, intraperitoneally). RVSP and RV/LV+S, two indices of pulmonary artery systolic pressure, were measured to confirm the success of producing the HPH model. Organs were subsequently excised for additional experiments. For SUGEN models, animals received Su5416 (20 mg/kg subcutaneously, dissolved in DMSO; Sigma-Aldrich, St. Louis, MO, USA) immediately followed by hypoxia exposure. After 3 weeks of hypoxia, animals were returned to room air for another 4 weeks.

### Fluorescence *In Situ* Hybridization

To confirm the cellular localization of lncRNA-MEG3 in PASMCs, we performed FISH. The lncRNA-MEG3 FISH Probe Mix was designed and synthesized by RuiBo Biology (#C10910, Guanzhou, China). Experiments were performed according to the manufacturer's protocol. Briefly, excised organs were embedded in paraffin, and 4- $\mu$ m cryosections were deparaffinized. Following rehydration in phosphate-buffered saline and acetylation, slides were hybridized at 23°C for 3 h and then incubated with 200 ng custom-designed digoxigenin-labeled lncRNA-MEG3 probes (probe sequences: 5'-GGTCCCTCTCTGGCAACTGTTTCATTCATTTGATGC-3', 5'-CTCAGGCCTGTCGCGTCTTCTGTGCCATTTGCTG-3', 5'-TTTACAAATGGACTCTTGTTCCTGTCGTTTCCCACC-3') in 200  $\mu$ L hybridization buffer at 60°C overnight. Following sequential washing in 5  $\times$  saline sodium citrate (SSC), 0.2  $\times$  SSC (20  $\times$  SSC contains 3 M NaCl, 0.3 M Na-citrate, pH 7.0), and Tris-buffered saline (TBS), slides were blocked using 10% fetal calf serum in TBS for 2 h followed by incubation with cy3-labeled anti-digoxigenin antibodies (3.75 U/mL; Roche, Basel, Switzerland) in TBS at 4°C overnight. After washing with TBS, bound antibodies were detected by microscopy. Probes targeting  $\alpha$ SMA mRNA (5'-CCTTGAAGTACCCGATCGAACATGGCATCA-3'; 5'-CTGACTACCTCATGAAATGATCCTGACTGAGC-3'; 5'-GGAATCTGCTGGCATCCATGAAACCACC TA-3') were used as positive controls. NC probes were custom designed using the yeast SUC2 gene, which does not express in human and mice tissue (5'-AGCTATTCTCTTGATG GTGGTTA CACTTTTACTGA -3'; 5'-ACCCTGTTTTAGCTGCCAACTCCACTCAATTC AGA-3'; 5'-GATCATCCATGTCTTTGGTCCGCAA GTTTTCTTTG-3'), and a no-probe control using PBS with hybridization buffer. Then, samples were treated the same as the lncRNA-MEG3 FISH probes.

For *in vitro* cultured cell FISH, PASMCs were fixed in 4% paraformaldehyde and then incubated with lncRNA-MEG3 FISH Probe Mix overnight at 37°C. Fluorescence images were obtained using a fluorescence microscope. U6 FISH Probe Mix was used to image the nuclei, 18S FISH Probe Mix was used to localize the cytoplasm, and DAPI (4,6-diamidino-2-phenylindole) was used to label the nuclei. Images

were captured by microscopy and analyzed using Image Pro Plus software.

### **lncRNA-MEG3 Knockdown *In Vivo* and *In Vitro***

To silence the expression of lncRNA-MEG3 *in vitro*, we transfected PSMCs with siRNA targets to lncRNA-MEG3 (siMEG3-936, 5'-GCGUCUCCUGU GCCAUUUTT-3' sense; 5'-AAAUGGCACA GGAAGACGCTT-3' antisense), (siMEG3-1147, 5'-CC UCCUGGA UUAGCCAAATT-3' sense; 5'-UUUGGCCUAAUCCAGGAGG T T-3' antisense), and nontargeted control siRNA (siNC, 5'-UUCUCC GAACGUGUC ACGUTT-3' sense; 5'-ACGUGACACGUUCGGA GAATT-3' antisense) using X-treme Gene siRNA Transfection Reagent (Roche). In some experiments, lncRNA-MEG3 was knocked down using gapmers (gapmer-1, 5'-TCCATTTGCCTCATAA-3'; gapmer-3, 5'-CACTCCA TCACTCATA-3'), which were designed and synthesized by Exiqon (Vedbaek, Denmark).

To knock down the expression of lncRNA-MEG3 in PAs, we loaded siRNA against lncRNA-MEG3 (siMEG3) with octaarginine (R8) conjugated PEG2000-Lipid (R8-Lip) to form a lung-specific delivery system (R8-Lip-siMEG3) as previously described with some modifications.<sup>37</sup> Briefly, R8 and DSPE-PEG2000-Mal (molar ratio: 1.5:1) were mixed in chloroform and methanol (v/v = 2:1) at room temperature with gentle stirring for 48 h. The mixture was evaporated under a vacuum and then redissolved in chloroform after discarding the insoluble material. The supernatant (DSPE-PEG2000-R8) was evaporated again under a vacuum. Lipid compositions of the prepared liposomes were as follows: R8-modified liposomes (R8-LIP), SPC/Chol/DSPE-PEG2000/DSPE-PEG2000-R8 (molar ratio 59:33:3:5). A lipid film was produced by rotary evaporation of all lipids in chloroform. The films were left under a vacuum for 2 h. Hydration buffer was added to produce a concentration of 10  $\mu\text{mol}/3\text{ mL}$  of lipid. Lipid suspensions were sonicated with a probe sonicator at 80 W for 2 min. siMEG3 and lipid ingredients, at a siRNA to lipid molar ratio of 1:40, were dissolved in chloroform to prepare siRNA-loaded liposomes. Free siRNA was removed using a Sephadex-G50 column, and pellets were subsequently collected.

To efficiently knock down the expression of lncRNA-MEG3, we repeatedly injected R8-Lip-siMEG3 into the tail vein on days 1, 4, 7, and 14 during the experiment. R8-Lip and siMEG3 plus Lipofectamine 2000 (Life Technologies, Carlsbad, CA, USA) were used as controls. In some experiments, AMO-328 (miR-328-3p specific 2-O-methyl antisense inhibitory oligoribonucleotide) was loaded into the liposome together with siMEG3. The biodistribution of R8-Lip was evaluated using a labeled siRNA (si-MEG3), and fluorescence images were captured. Additionally,  $\alpha\text{SMA}$  stains or CD31<sup>+</sup> stains were used to confirm delivery to smooth muscle and endothelial compartments. The efficiency of MEG3 knockdown by R8-Lip-siMEG3 was confirmed using real-time PCR and FISH. To access the beneficial effect of R8-Lip-siMEG3 once PH established, we exposed mice to hypoxia for 2 weeks to establish PH and subsequently injected R8-Lip-siMEG3 (days 14, 17, 21, and 28) through the tail vein for another 3 weeks.

### **lncRNA-MEG3 Overexpression in PSMCs**

An overexpression vector for lncRNA-MEG3 was constructed. Briefly, using *Mus musculus* MEG3 transcript variant 1, (GenBank: NR\_003633.3) as a template, PCR was performed with 5'-TGAA CCGTCAGATCGAATTCGCCACCGGGACCTTTACAGACC-3' and 5'-AATCCAGAGGTTGAGGATCCTTACAGGTGCACCTAA TTGGATGGATA-3' to obtain a fragment of 1644 base pairs (bp), which was the gene sequence of lncRNA-MEG3 and upstream and downstream recombination exchange arms. The pLenti-EF1a-EGFP-P2A-Puro-CMV-MCS (H145) vector (CutSmart, New England Biolabs, Ipswich, MA, USA) was digested with EcoR I-HF and BamH I-HF, and the carrier was recovered by electrophoresis after scanning for the 8.8-kb fragment. Enzyme digestion reactions contained 2  $\mu\text{g}$  plasmid, 1  $\mu\text{L}$  enzyme, 5  $\mu\text{L}$  buffer, and double-distilled water to a total volume of 50  $\mu\text{L}$ . Reactions were incubated at 37°C for 2 h. After 1% agarose gel electrophoresis, the vector was removed from the gel and recovered using a gel recovery kit. The lncRNA-MEG3 PCR product was ligated into the vector using a seamless cloning kit to obtain the target plasmid with ampicillin resistance. PSMCs were transfected with the plasmid and then harvested for RNA isolation, cell proliferation assay, cell migration assay, and flow cytometry analysis.

### **MicroScale Thermophoresis**

**Sample preparation:** For the experiment, FAM-labeled single-stranded RNA (ssRNA) of lncRNA-MEG3 molecules was amplified using 5'-GTTTCTGGGCTACGGGTTTG-3' sense; 5'-CATACTG TTGTC ACTCACCC-3' antisense. The PCR product of ssRNA was 163 nt (2030-2193). Unlabeled single-chain miR-328-3p mimics (5'-CUGGCCUCUCUGCCCUUCCGU-3') or NC (5'-UUGUACU ACACAAAAGUACUG-3') was added at a 1:1 dilution. For measurement, samples were filled into standard capillaries. Measurements were performed on a NanoTemper Monolith NT.115 instrument. Analysis was performed at 22% LED power and 20% MST power, "Fluo. Before" time was 5 s, MST on time was 30 s, and "Fluo. After" time was 5 s.

### **Statistical Analysis**

Quantitative data are expressed as the means  $\pm$  SEM. Statistical analysis was carried out with the GraphPad Prism software. Data analysis was performed with paired Student's t test (for two means) or one-way ANOVA followed by Dunnett's test (for >2 means) where appropriate. Sample sizes (n) are reported in the corresponding figure legends. Significance levels of \*\*p < 0.01 and \*p < 0.05 were adopted.

### **SUPPLEMENTAL INFORMATION**

Supplemental Information can be found online at <https://doi.org/10.1016/j.ymthe.2019.07.022>.

### **AUTHOR CONTRIBUTIONS**

Conceptualization, Y.X., X.Z., and D.Z.; Methodology, Y.X., X.Z., Y.F., J.Q., M.L., M.M., S.W., and S.L.; Investigation, Y.X., X.Z., Y.F., J.Q., and M.L.; Resources, S.L. and D.Z.; Writing – Original Draft, Y.X., X.Z., J.Q., and M.L.; Writing – Review & Editing, X.Z.

and D.Z.; Supervision, X.Z. and D.Z.; Funding Acquisition, Y.X., X.Z., and D.Z.

## CONFLICTS OF INTEREST

The authors declare no competing interests.

## ACKNOWLEDGMENTS

We would like to thank Guangtian Wang for the preparation of R8-Liposome. The PSMCs of iPAH patients were provided by Professor Jian Wang from State Key Laboratory of Respiratory Diseases, Guangzhou Institute of Respiratory Disease, and The First Affiliated Hospital of Guangzhou Medical University. This work was supported by the National Natural Science Foundation of China (31771276 and 31471095 to D.Z., 31701010 to Y.X., 31500936 to X.Z., and 81600034 to S.W.); Specialized Research Fund for the Doctoral Program of Higher Education (20112307110022 to D.Z.); the Natural Science Foundation of Heilongjiang Province (C2016038 to Y.X.); China Postdoctoral Science Foundation (2016M601452 to Y.X.); Postdoctoral Foundation of Heilongjiang Province (LBH-Z16239 to Y.X.); Key Laboratory of Cardiovascular Medicine Research (Harbin Medical University), Ministry of Education (2013008 to Y.X.); Postdoctoral Career Development Fund of Heilongjiang Province (LBH-Q14119 to X.Z.); Harbin Medical University Scientific Research Innovation Fund (2016JCZX05 to Y.X. and 2017JCZX09 to X.Z.); Foundation of Daqing Department of Science and Technology (Szdy-2015-02 to Y.X.), Specifically Foundation for Returned Scholars in Heilongjiang Province to X.Z., and Wu Liande Youth Science Foundation of Harbin Medical University-Daqing (DQWLD201601 to X.Z.).

## REFERENCES

- Anderson, J.R., and Nawarskas, J.J. (2010). Pharmacotherapeutic management of pulmonary arterial hypertension. *Cardiol. Rev.* *18*, 148–162.
- Welsh, D.J., and Peacock, A.J. (2013). Cellular responses to hypoxia in the pulmonary circulation. *High Alt. Med. Biol.* *14*, 111–116.
- Nathan, S.D., and Hassoun, P.M. (2013). Pulmonary hypertension due to lung disease and/or hypoxia. *Clin. Chest Med.* *34*, 695–705.
- Crosswhite, P., and Sun, Z. (2014). Molecular mechanisms of pulmonary arterial remodeling. *Mol. Med.* *20*, 191–201.
- Bienertova-Vasku, J., Novak, J., and Vasku, A. (2015). MicroRNAs in pulmonary arterial hypertension: pathogenesis, diagnosis and treatment. *J. Am. Soc. Hypertens.* *9*, 221–234.
- Guo, L., Qiu, Z., Wei, L., Yu, X., Gao, X., Jiang, S., Tian, H., Jiang, C., and Zhu, D. (2012). The microRNA-328 regulates hypoxic pulmonary hypertension by targeting at insulin growth factor 1 receptor and L-type calcium channel- $\alpha$ 1C. *Hypertension* *59*, 1006–1013.
- Qian, Z., Zhang, L., Chen, J., Li, Y., Kang, K., Qu, J., Wang, Z., Zhai, Y., Li, L., and Gou, D. (2016). MiR-328 targeting PIM-1 inhibits proliferation and migration of pulmonary arterial smooth muscle cells in PDGFBB signaling pathway. *Oncotarget* *7*, 54998–55011.
- Chang, Y.N., Zhang, K., Hu, Z.M., Qi, H.X., Shi, Z.M., Han, X.H., Han, Y.W., and Hong, W. (2016). Hypoxia-regulated lncRNAs in cancer. *Gene* *575*, 1–8.
- Huarte, M. (2015). The emerging role of lncRNAs in cancer. *Nat. Med.* *21*, 1253–1261.
- Kour, S., and Rath, P.C. (2016). Long noncoding RNAs in aging and age-related diseases. *Ageing Res. Rev.* *26*, 1–21.
- Mercer, T.R., and Mattick, J.S. (2013). Structure and function of long noncoding RNAs in epigenetic regulation. *Nat. Struct. Mol. Biol.* *20*, 300–307.
- Meseure, D., Drak Alsibai, K., Nicolas, A., Bieche, I., and Morillon, A. (2015). Long Noncoding RNAs as New Architects in Cancer Epigenetics, Prognostic Biomarkers, and Potential Therapeutic Targets. *BioMed Res. Int.* *2015*, 320214.
- Yoon, J.H., Abdelmohsen, K., and Gorospe, M. (2014). Functional interactions among microRNAs and long noncoding RNAs. *Semin. Cell Dev. Biol.* *34*, 9–14.
- Karreth, F.A., Tay, Y., Perna, D., Ala, U., Tan, S.M., Rust, A.G., DeNicola, G., Webster, K.A., Weiss, D., Perez-Mancera, P.A., et al. (2011). In vivo identification of tumor-suppressive PTEN ceRNAs in an oncogenic BRAF-induced mouse model of melanoma. *Cell* *147*, 382–395.
- Salmena, L., Poliseno, L., Tay, Y., Kats, L., and Pandolfi, P.P. (2011). A ceRNA hypothesis: the Rosetta Stone of a hidden RNA language? *Cell* *146*, 353–358.
- Tay, Y., Kats, L., Salmena, L., Weiss, D., Tan, S.M., Ala, U., Karreth, F., Poliseno, L., Provero, P., Di Cunto, F., et al. (2011). Coding-independent regulation of the tumor suppressor PTEN by competing endogenous mRNAs. *Cell* *147*, 344–357.
- Ferdin, J., Nishida, N., Wu, X., Nicoloso, M.S., Shah, M.Y., Devlin, C., Ling, H., Shimizu, M., Kumar, K., Cortez, M.A., et al. (2013). HINCUTs in cancer: hypoxia-induced noncoding ultraconserved transcripts. *Cell Death Differ.* *20*, 1675–1687.
- Yang, F., Huo, X.S., Yuan, S.X., Zhang, L., Zhou, W.P., Wang, F., and Sun, S.H. (2013). Repression of the long noncoding RNA-LET by histone deacetylase 3 contributes to hypoxia-mediated metastasis. *Mol. Cell* *49*, 1083–1096.
- Wu, J., Okada, T., Fukushima, T., Tsudzuki, T., Sugiura, M., and Yukawa, Y. (2012). A novel hypoxic stress-responsive long non-coding RNA transcribed by RNA polymerase III in Arabidopsis. *RNA Biol.* *9*, 302–313.
- Michalik, K.M., You, X., Manavski, Y., Doddaballapur, A., Zörnig, M., Braun, T., John, D., Ponomareva, Y., Chen, W., Uchida, S., et al. (2014). Long noncoding RNA MALAT1 regulates endothelial cell function and vessel growth. *Circ. Res.* *114*, 1389–1397.
- Manji, S.S., Sørensen, B.S., Klockars, T., Lam, T., Hutchison, W., and Dahl, H.H. (2006). Molecular characterization and expression of maternally expressed gene 3 (Meg3/Gtl2) RNA in the mouse inner ear. *J. Neurosci. Res.* *83*, 181–190.
- Zhou, Y., Zhang, X., and Klibanski, A. (2012). MEG3 noncoding RNA: a tumor suppressor. *J. Mol. Endocrinol.* *48*, R45–R53.
- Braconi, C., Kogure, T., Valeri, N., Huang, N., Nuovo, G., Costinean, S., Negrini, M., Miotto, E., Croce, C.M., and Patel, T. (2011). microRNA-29 can regulate expression of the long non-coding RNA gene MEG3 in hepatocellular cancer. *Oncogene* *30*, 4750–4756.
- Lu, K.H., Li, W., Liu, X.H., Sun, M., Zhang, M.L., Wu, W.Q., Xie, W.P., and Hou, Y.Y. (2013). Long non-coding RNA MEG3 inhibits NSCLC cells proliferation and induces apoptosis by affecting p53 expression. *BMC Cancer* *13*, 461.
- Zhou, X., Ji, G., Ke, X., Gu, H., Jin, W., and Zhang, G. (2015). MiR-141 Inhibits Gastric Cancer Proliferation by Interacting with Long Noncoding RNA MEG3 and Down-Regulating E2F3 Expression. *Dig. Dis. Sci.* *60*, 3271–3282.
- Bonnet, S., Provencher, S., Guignabert, C., Perros, F., Boucherat, O., Schermuly, R.T., Hassoun, P.M., Rabinovitch, M., Nicolls, M.R., and Humbert, M. (2017). Translating Research into Improved Patient Care in Pulmonary Arterial Hypertension. *Am. J. Respir. Crit. Care Med.* *195*, 583–595.
- Potus, F., Ruffenach, G., Dahou, A., Thebault, C., Breuils-Bonnet, S., Tremblay, È., Nadeau, V., Paradis, R., Graydon, C., Wong, R., et al. (2015). Downregulation of MicroRNA-126 Contributes to the Failing Right Ventricle in Pulmonary Arterial Hypertension. *Circulation* *132*, 932–943.
- Schuster-Gossler, K., Bilinski, P., Sado, T., Ferguson-Smith, A., and Gossler, A. (1998). The mouse Gtl2 gene is differentially expressed during embryonic development, encodes multiple alternatively spliced transcripts, and may act as an RNA. *Dev. Dyn.* *212*, 214–228.
- Sun, Z., Nie, X., Sun, S., Dong, S., Yuan, C., Li, Y., Xiao, B., Jie, D., and Liu, Y. (2017). Long Non-Coding RNA MEG3 Downregulation Triggers Human Pulmonary Artery Smooth Muscle Cell Proliferation and Migration via the p53 Signaling Pathway. *Cell Physiol. Biochem.* *42*, 2569–2581.
- Zhu, B., Gong, Y., Yan, G., Wang, D., Qiao, Y., Wang, Q., Liu, B., Hou, J., Li, R., and Tang, C. (2018). Down-regulation of lncRNA MEG3 promotes hypoxia-induced human pulmonary artery smooth muscle cell proliferation and migration via repressing PTEN by sponging miR-21. *Biochem. Biophys. Res. Commun.* *495*, 2125–2132.

31. Zhao, J., Zhang, X., Zhou, Y., Ansell, P.J., and Klibanski, A. (2006). Cyclic AMP stimulates MEG3 gene expression in cells through a cAMP-response element (CRE) in the MEG3 proximal promoter region. *Int. J. Biochem. Cell Biol.* 38, 1808–1820.
32. Armoskus, C., Moreira, D., Bollinger, K., Jimenez, O., Taniguchi, S., and Tsai, H.W. (2014). Identification of sexually dimorphic genes in the neonatal mouse cortex and hippocampus. *Brain Res.* 1562, 23–38.
33. Shi, L., Kojonazarov, B., Elghezawy, A., Popp, R., Dahal, B.K., Böhm, M., Pullamsetti, S.S., Ghofrani, H.A., Gödecke, A., Jungmann, A., et al. (2016). miR-223-IGF-IR signalling in hypoxia- and load-induced right-ventricular failure: a novel therapeutic approach. *Cardiovasc. Res.* 111, 184–193.
34. Paulin, R., Meloche, J., Jacob, M.H., Bissierier, M., Courboulin, A., and Bonnet, S. (2011). Dehydroepiandrosterone inhibits the Src/STAT3 constitutive activation in pulmonary arterial hypertension. *Am. J. Physiol. Heart Circ. Physiol.* 301, H1798–H1809.
35. Renard, S., Paulin, R., Breuils-Bonnet, S., Simard, S., Pibarot, P., Bonnet, S., and Provencher, S. (2013). Pim-1: A new biomarker in pulmonary arterial hypertension. *Pulm. Circ.* 3, 74–81.
36. Mondal, T., Subhash, S., Vaid, R., Enroth, S., Uday, S., Reinius, B., Mitra, S., Mohammed, A., James, A.R., Hoberg, E., et al. (2015). MEG3 long noncoding RNA regulates the TGF- $\beta$  pathway genes through formation of RNA-DNA triplex structures. *Nat. Commun.* 6, 7743.
37. Yin, Y., Wu, X., Yang, Z., Zhao, J., Wang, X., Zhang, Q., Yuan, M., Xie, L., Liu, H., and He, Q. (2013). The potential efficacy of R8-modified paclitaxel-loaded liposomes on pulmonary arterial hypertension. *Pharm. Res.* 30, 2050–2062.
38. Spizzo, R., Almeida, M.I., Colombatti, A., and Calin, G.A. (2012). Long non-coding RNAs and cancer: a new frontier of translational research? *Oncogene* 31, 4577–4587.
39. Provencher, S., Archer, S.L., Ramirez, F.D., Hibbert, B., Paulin, R., Boucherat, O., Lacasse, Y., and Bonnet, S. (2018). Standards and Methodological Rigor in Pulmonary Arterial Hypertension Preclinical and Translational Research. *Circ. Res.* 122, 1021–1032.



YMTHE, Volume 27

## **Supplemental Information**

### **Long Noncoding RNA-Maternally Expressed Gene 3**

#### **Contributes to Hypoxic Pulmonary Hypertension**

**Yan Xing, Xiaodong Zheng, Yao Fu, Jing Qi, Minghui Li, Mingfei Ma, Shuang Wang, Shuzhen Li, and Daling Zhu**

Supplemental Figure S1

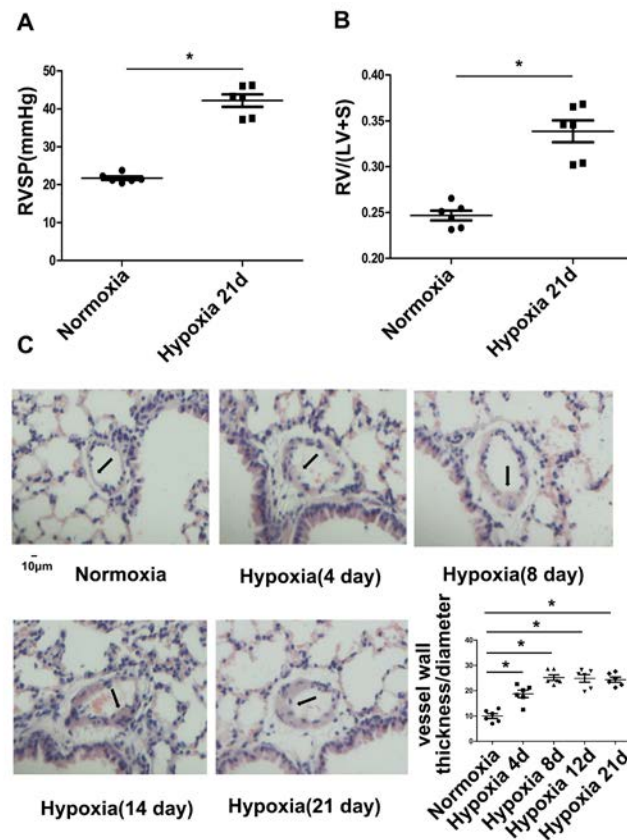

**Figure S1. Chronic Hypoxia-Induced PAH mice model.** (A) The right ventricular systolic pressure (RVSP) and (B) the right ventricular to left ventricular + spatial weight ratio, two indirect indicators of pulmonary arterial systolic pressure were significantly higher in the 21days hypoxic group than in normal controls. (C) H&E staining demonstrated that the morphology of pulmonary vascular remodeling, as the vessel wall to vessel diameter ratio was significantly higher in hypoxia treated animals groups.  $n = 4$  independent experiments.  $*P < 0.05$ .

Supplemental Figure S2

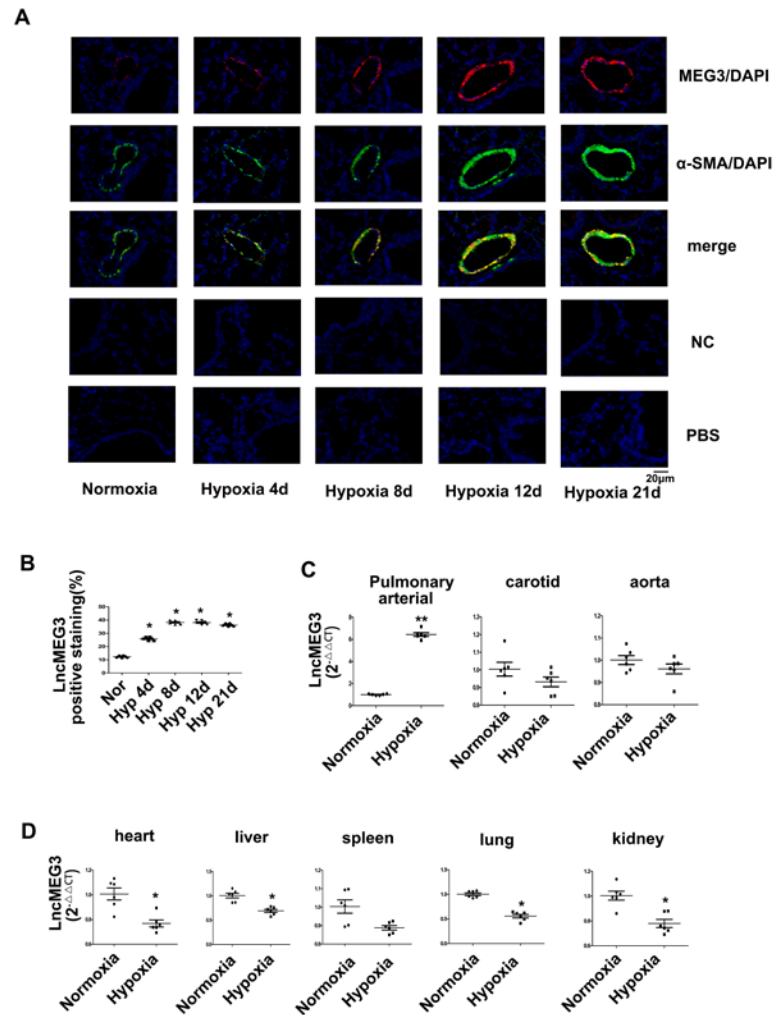

**Figure S2. Effects of hypoxia on long noncoding RNA (lncRNA) – Maternally Expressed Gene 3 (MEG3) expression.** (A) Mouse was exposed to hypoxia (10% FiO<sub>2</sub>) for indicated times, lung section was used to detect lncRNA-MEG3 expression by fluorescence in situ hybridization (FISH). FISH probes targeting to  $\alpha$ SMA mRNA were used as positive control, probes target to SUC2 mRNA and PBS were used as negative control. (B) Bar graph showed that hypoxia time-dependently increased the lncRNA-MEG3 expression in mouse pulmonary arteries (PAs) (n = 3). (C) LncRNA-MEG3 expression was detected by real-time PCR in isolated pulmonary arteries, carotid artery and aorta, and (D) in heart, liver, spleen, lung, kidney. (n = 4). \* $P < 0.05$ , \*\* $P < 0.01$ .

Supplemental Figure S3

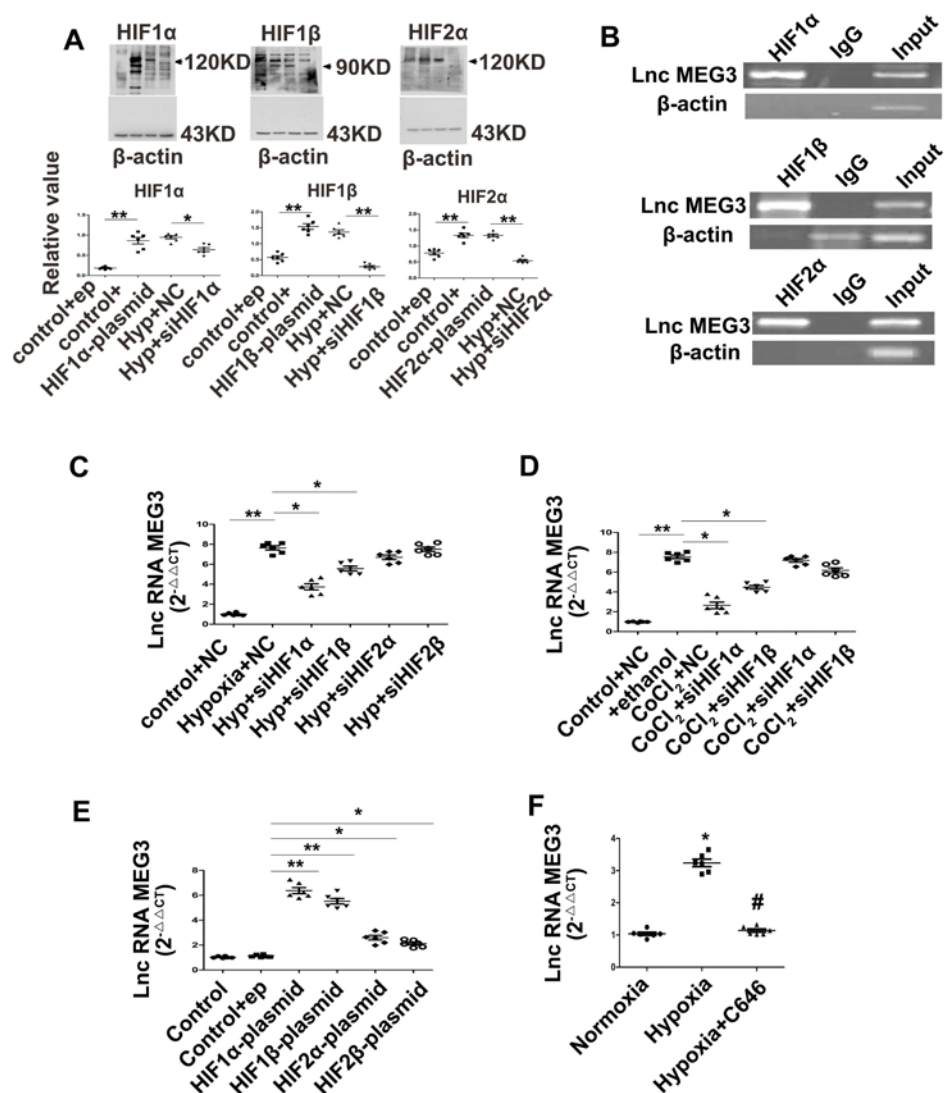

**Figure S3. Hypoxia regulated lncRNA-MEG3 through HIF1.** (A) Represent image of knockdown and overexpression of HIF1α, HIF1β and HIF2α. (B) CHIP experiment found HIF1α, HIF1β, and HIF2α were able to binding to the promoter region of MEG3. (C) LncRNA-MEG3 expression was detected by real-time PCR in mPASCs was transfected with siRNA targeting HIF1α, HIF1β, HIF2α and HIF2β, then exposed to hypoxia or cobalt chloride (CoCl<sub>2</sub>, 100μM) (D) for 24 h. (E) mPASCs was transfected with plasmids overexpressing HIF1α, HIF2α, HIF1β and HIF2β. (F) Effects of histone acetyltransferase inhibitor C646 on lncRNA-MEG3 expression under hypoxia condition. n = 6 independent experiments. \**P* < 0.05, \*\**P* < 0.01.



Supplemental Figure S4

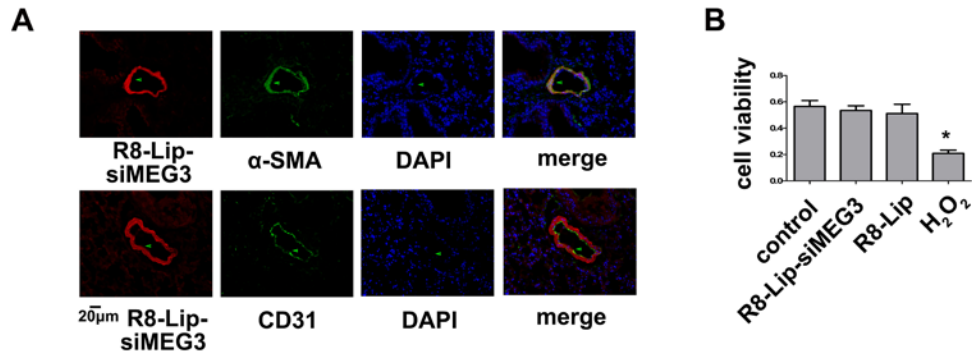

**Figure S4. Lung specific knockdown of lncNRA-MEG3 prevented hypoxia-induced PSMCs proliferation.** (A) Colocalization of labeled siMEG3 (red) with immunostaining of  $\alpha$ SMA (up panel, green) but not CD31 (lower panel, green) indicated that siRNA was delivered to the smooth muscle layer by the R8-liposome delivery system. (B) MTT data showed that R8-modified liposomes were not cytotoxic towards PSMCs after 24 h. n = 6 independent experiments. \* $P < 0.05$ , \*\* $P < 0.01$ .

Supplemental Figure S5

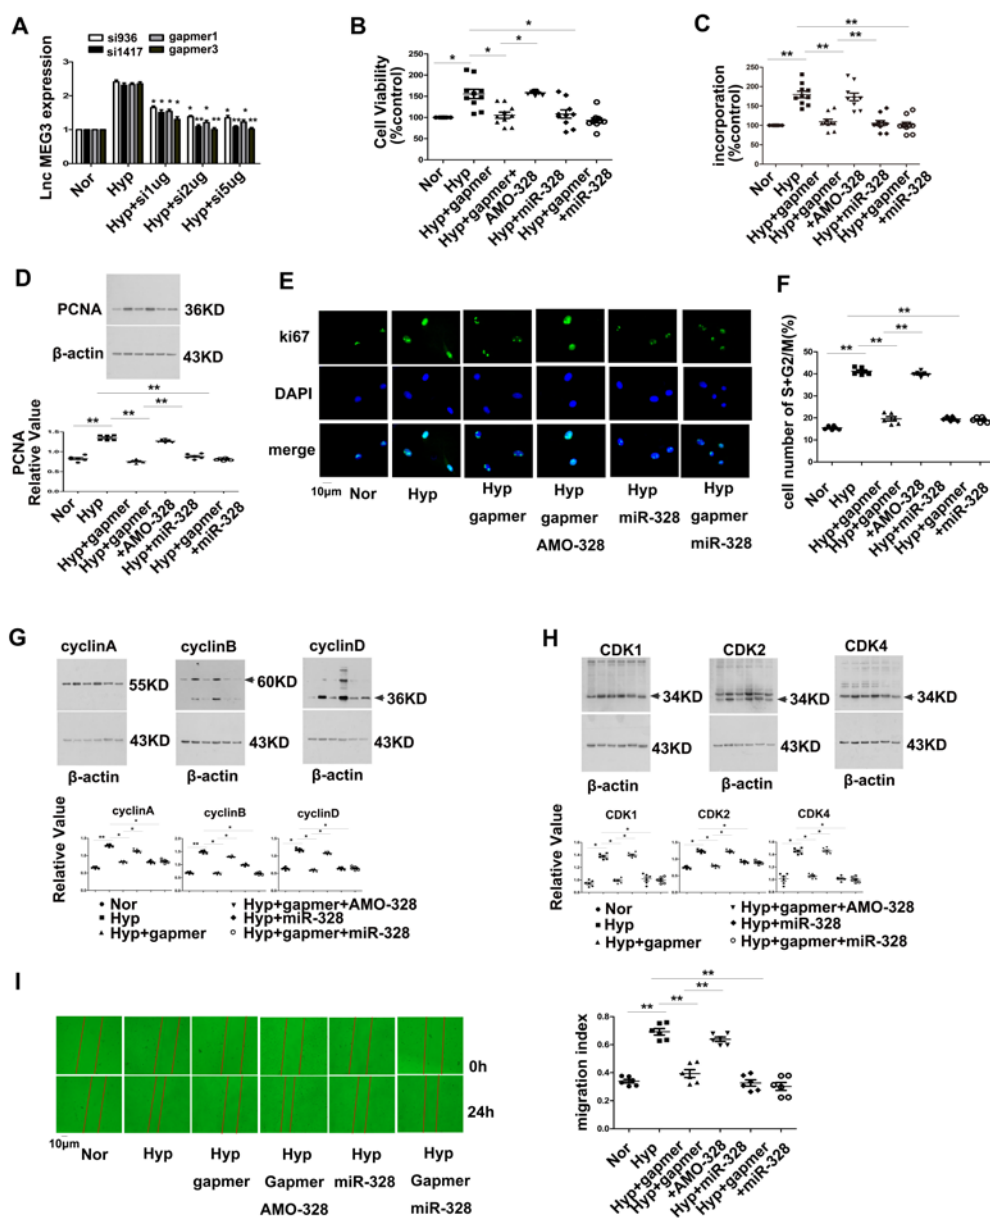

**Figure S5. Knockdown of lncRNA-MEG3 by gapmer reversed hypoxia-induced PASCs proliferation, cell cycle progression and cellular migration.** (A) The dose-dependent manners of two small interference RNA (si936 & si1417) and two different gapmerRs were designed and transfected to knockdown the expression of lncRNA-MEG3. The gapmers of lncRNA-MEG3 significantly abolished the increasing PASCs cell viability induced by hypoxia determined by MTT (B), The BrdU incorporation (C), and PCNA expression (D) determined by immunoblotting and Ki67 staining (E) by immunocytochemistry. (F) Cell cycle progression detected by flow cytometry, (G) Cyclins and (H) CDKs expression, and (I) cellular migration showed the gapmer of lncRNA-MEG3 on hypoxia-evoked cell cycle progression and cellular migration. PCNA represents proliferating cell nuclear antigen. CDK represents cyclin-dependent kinases.  $n = 6$  independent experiments. \* $P < 0.05$ , \*\* $P < 0.01$ .

Supplemental Figure S6

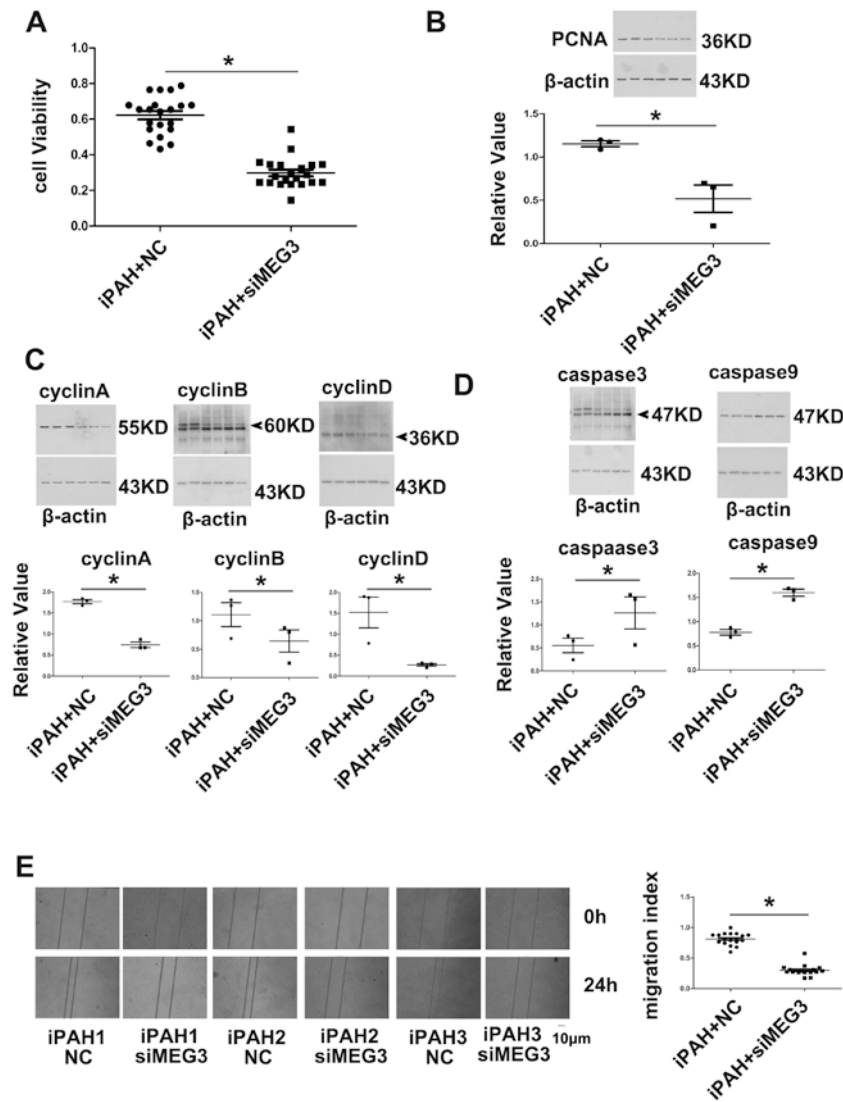

**Figure S6. MEG3 reduces iPAH-PASMC viability, proliferation, resistance to apoptosis and migration.** (A) Cell viability, (B) PCNA expression, (C) Cyclins expression, and (D) CDK expression detected by western blot, (E) Cell migration experiments. PCNA represents proliferating cell nuclear antigen. CDK represents cyclin-dependent kinases. n = indicated independent experiments. \*P<0.05, \*\*P<0.01.

Supplemental Figure S7

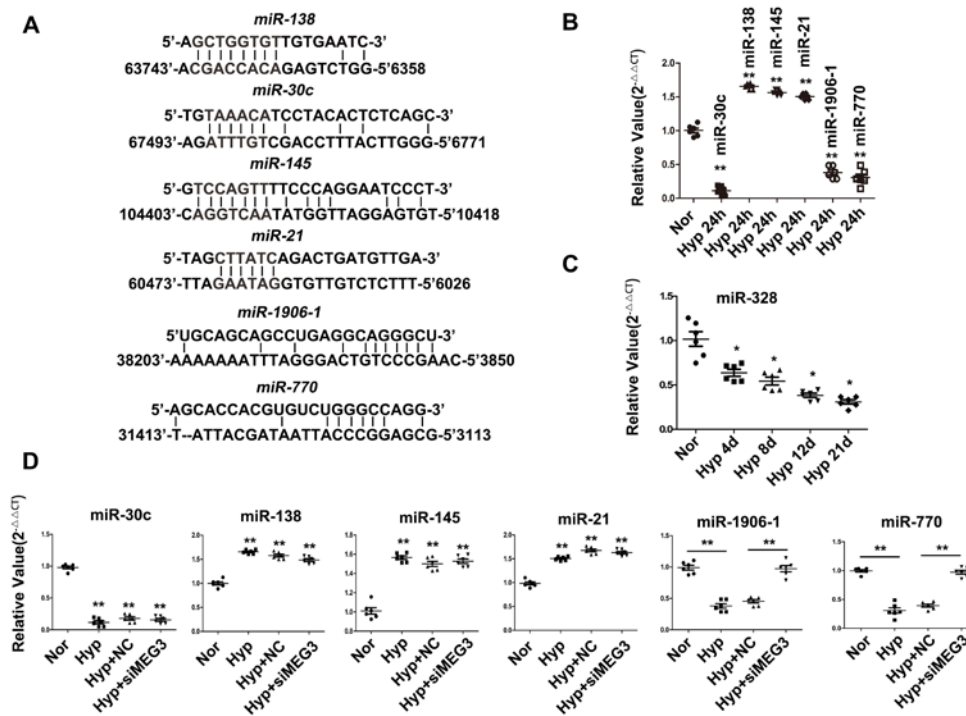

**Figure S7. The association of lncRNA-MEG3 with other microRNAs.** (A) Prediction of the binding site of lncRNAs-MEG3 with miR-138, miR-30c, miR-145, miR-21, miR-1906-1, and miR-770. (B) Real-time PCR detected the expression of miR-138, miR-30c, miR-145, miR-21, miR-1906-1, and miR-770 in hypoxia treated mPASCs. (C) The downregulation of miR-30c, and the upregulation of miR-138, miR-145 and miR-21 expression were not affected by lncRNA-MEG3 knockdown, however, miR-1906-1 and miR-770 expression was regulated by lncRNA-MEG3 under hypoxia condition. (D) Real-time PCR revealed that hypoxia inhibited miR-328 expression with a time-dependent manner.  $n = 6$  independent experiments.  $**P < 0.01$ .



Supplemental Figure S8

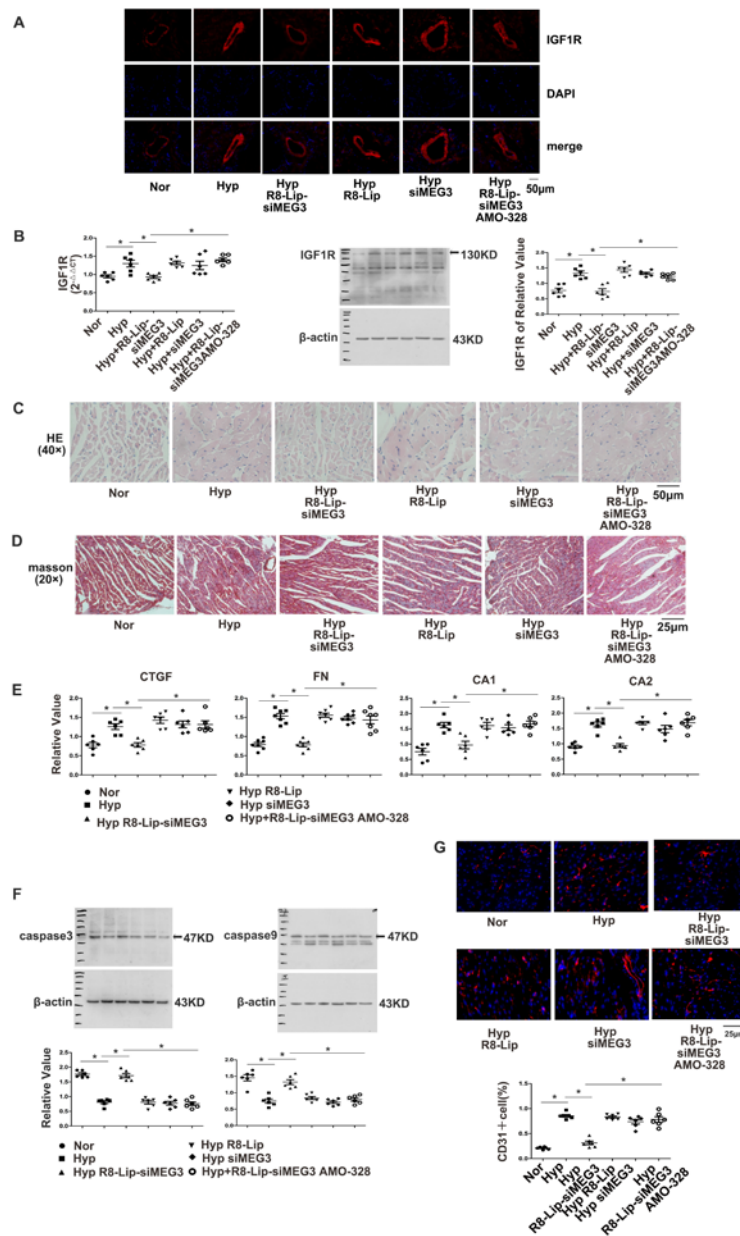

**Figure S8. IGF1R expression and right ventricular failure was modulated by lncRNA-MEG3/miR-328-3p in relevant mouse models.** (A) Immunofluorescence target to IGF1R in pulmonary artery. (B) IGF1R mRNA expression in right ventricular detected by real-time PCR. (C) IGF1R protein expression in right ventricular detected by western blot. (D) The Cardiomyocytes hypertrophy was detected by H&E staining. (E) The fibrosis of right ventricular was assessed by Masson's trichrome staining, (F) Real-time PCR detected the fibrosis markers, markers, includes connective tissue growth factor, fibronectin, collagens A1 and A2 in right ventricular. (G) The apoptosis of cardiomyocytes was assessed by the expression of caspase 3 and caspase 9. (G) Immunofluorescence target to CD31 was measured in the right ventricular section. The microvessel density was expressed as the proportion of CD31<sup>+</sup> cells in the whole section. n = 6 animals, a minimum of 10 resistance pulmonary arteries (<100 µm external diameter) were analyzed per animal. \*\*P<0.01.

Supplemental Figure S9

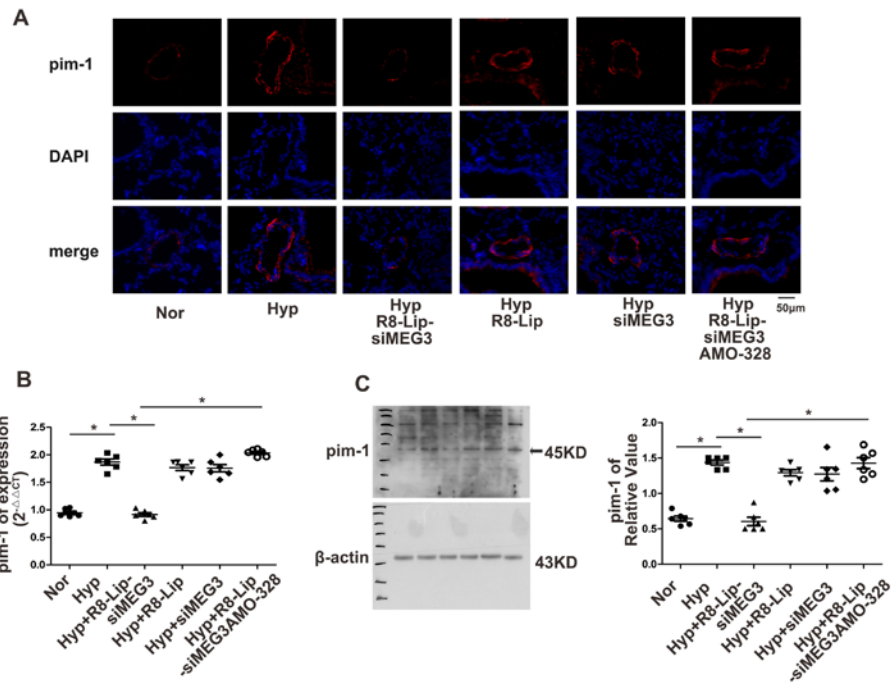

**Figure S9. Pim1 expression was modulated by lncRNA-MEG3/miR-328-3p signaling.** (A) Pim1 expression was detected by immunofluorescence in lung section. (B) Real-time PCR detected the Pim1 mRNA expression in lung tissue. (C) Western blot examined the Pim1 protein expression in lung tissue. Pim1 expression was increased by in pulmonary artery from HPH mice, pulmonary-specific MEG3 knockdown (R8-Lip-siMEG3) attenuated, whereas siRNA targets to MEG3 without any modification (siMEG3) and R8-Liposome did not prevent the hypoxia-triggered pim1 expression in pulmonary artery.  $n = 6$  independent experiments.  $*P < 0.05$ .

Supplemental Figure S10

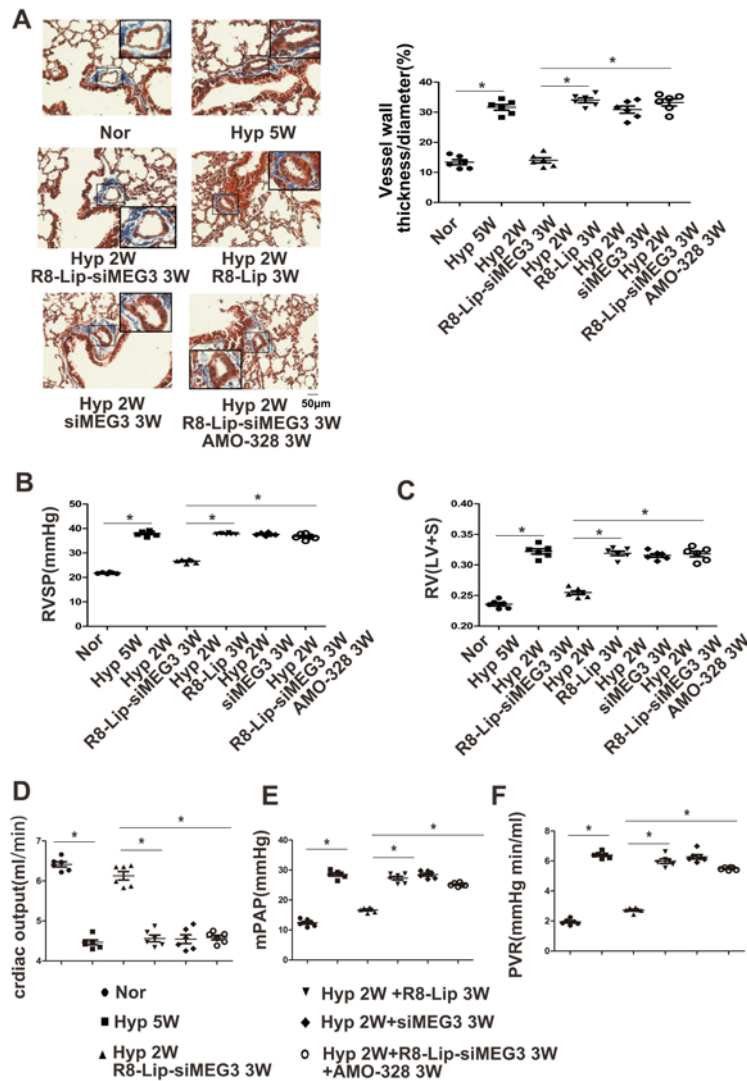

**Figure S10. The beneficial effect of R8-Lip-siMEG3 once PH established.** (A) Masson trichrome staining, (B) RVSP, (C) RV/LV+S, (D) Cardiac output (CO), (E) mPAP, (F) Pulmonary vascular resistance calculated as mean pulmonary arterial pressure/CO. All these data indicated that lung specific delivery of R8-Lip-siMEG3 was able to reverse the established PH induced by hypoxia. Moreover, miR-328-3p therapy was able to reverse the effects of R8-Lip-siMEG3. n = 6 animals, a minimum of 10 resistance pulmonary arteries (<100 µm external diameter) were analyzed per animal. \*P<0.05, \*\*P<0.01.

## Supplemental Table S1

| Patient | Diagnosis | Origin  | Sex | Age | mPAP<br>(mmHg) | (PAWP)<br>(mmHg) | RAP<br>(mmHg) | PVR<br>(WU) | CO<br>(L/min) | LVEF<br>(%) | TAPSE<br>(mm) | NYHA<br>FC# | ERA | PDE5<br>inhibitor | Epoprostenol |
|---------|-----------|---------|-----|-----|----------------|------------------|---------------|-------------|---------------|-------------|---------------|-------------|-----|-------------------|--------------|
| 1       | iPAH      | Surgery | F   | 48  | 40             | 13               | 11            | 6.92        | 3.9           | 55%         | 12            | II          | no  | yes               | no           |
| 2       | iPAH      | Surgery | M   | 43  | 43             | 11               | 7             | 6.95        | 4.6           | 60%         | 11            | II          | no  | yes               | no           |
| 3       | iPAH      | Surgery | M   | 32  | 47             | 3                | 0             | 9.78        | 4.5           | 60%         | 9             | II          | yes | yes               | no           |

CO: cardiac output; iPAH: idiopathic pulmonary arterial hypertension; F: female; LVEF: left ventricle ejection fraction; M: male; mmHg: millimetres of mercury; mPAP: mean pulmonary artery pressure; N/A: not available; NYHA FC: New York Heart Association functional class; PAWP: pulmonary artery wedge pressure; PVR: pulmonary vascular resistance; RAP: right atrial pressure; WU: Wood units. ERA: endothelin receptor antagonist; PDE5: phosphodiesterase-5.

## Supplemental Methods

### *Animal Model of Chronic Hypoxia-Induced PH and tissue preparation*

Adult male C57BL/6 mice (mean weight of 30 g) were obtained from the Experimental Animal Center of Harbin Medical University, which is completely accredited by policies of the Institutional Animal Care and Use Committee. The animal study was approved by the ethics review board of Harbin Medical University ([2012]-006). The study design was trying to following the guideline by Provencher et.al.<sup>1</sup> Including but not limited to two PH models, invasive hemodynamic assessment, image-base data, randomization, blinded assessment of standardized outcomes et. al. Animals were conditioned at a controlled ambient temperature of  $22 \pm 2$  °C with  $50\% \pm 10\%$  relative humidity and at a 12-h light–dark cycle (lights on at 8:00 am). Standard rat chow and water were provided adlibitum to all mice.

For the chronic hypoxia induced pulmonary hypertension model, Mice were randomized for exposure for the indicated times to normal and hypoxic environments with fractional inspired oxygen ( $FiO_2$ ) of 0.21 and 0.12, respectively, as previously described.<sup>2</sup> At the end of the indicated hypoxia exposure period, mice were anesthetized with chloral hydrate (40 mg/kg, i.p.). Right ventricular systolic pressure (RVSP) and right ventricular to left ventricular + spatial weight ratio (RV/LV+S), two index of pulmonary artery systolic pressure were measured, the methods were described in the following. In some experiments, cardiac output was measure by left ventricular catheters. Then the chest was opened, following by tissues (heart, spleen, kidney, liver, lungs, aorta and carotid artery) were harvested for the following experiments. The right lung was then cut into pieces that were either fixed with 4% paraformaldehyde PBS solution before being embedded in paraffin blocks for hematoxylin-eosin (H&E) staining or stored at  $-80^\circ\text{C}$  for protein and mRNA analyses. The external diameter and medial wall thickness were measured using a calibrated micrometer. The percent of vessel wall thickness of each artery was calculated.

For the SUGEN models, Animals received Su5416 (20 mg/kg subcutaneously; dissolved in DMSO; Sigma-Aldrich, St Louis, MO, USA), immediately followed by hypoxia exposure immediately. After 3 weeks of hypoxia, animals were returned to room air for another 4 weeks.

To access the beneficial effect of R8-Lip-siMEG3 once PH established, mice was exposure to hypoxia for 2 weeks to establish the PH, then R8-Lip-siMEG3 was injected through the tail vein (4 times on day 14, 17, 21 and 28) and housing in hypoxia chamber for another 3 weeks.



To knock down the expression of lncRNA-MEG3 in pulmonary arteries (PAs), siRNA against lncRNA-MEG3 (siMEG3) was loaded with octaarginine (R8) conjugated PEG2000-Lipid (R8-Lip) to form a lung-specific delivery system (R8-Lip-siMEG3) as previously described with some modifications. Briefly, octaarginine (R8) and DSPE-PEG2000-Mal (molar ratio: 1.5:1) were mixed in chloroform/methanol (v/v = 2:1) at room temperature with gentle stirring for 48 h. The mixture was evaporated under vacuum and then re-dissolved in chloroform, after discarding the insoluble material; the supernatant (DSPE-PEG2000-R8) was evaporated again under vacuum. Lipid compositions of the prepared liposomes were as follows: R8 modified liposomes (R8-LIP), SPC/Chol/DSPE-PEG2000/DSPE-PEG2000-R8 (molar ratio 59:33:3:5). A lipid film was produced by rotary evaporation of all lipids in chloroform. The films were left under vacuum for 2 h. Hydration buffer was added to produce a concentration of 10  $\mu\text{mol}/3 \text{ mL}$  of lipid. The lipid suspensions were sonicated with a probe sonicator at 80 W for 2 min. siMEG3 and lipid ingredients, at a siRNA to lipid molar ratio of 1:40, were dissolved in chloroform to prepare siRNA-loaded liposomes. Free siRNA was removed using a Sephadex-G50 column and the pellets were collected. The bio-distribution of R8-Lip was evaluated with a labeled siRNA (si-MEG3) and fluorescence images were captured. Additionally,  $\alpha\text{SMA}$  stains or CD31+ stains were used to detect smooth muscle and endothelial compartments with delivery. To efficiently knock down the expression of lncRNA-MEG3, R8-Lip-siMEG3 was repeatedly injected on days 1, 4, 7, and 14 during experiment. R8-Lip and siMEG3 plus Lipofectamine 2000 (Life Technologies, Carlsbad, CA, USA) were used as controls and repeatedly injected. The injected volume is 100  $\mu\text{L}/\text{mice}$ . After injection, mice were returned to normal and hypoxic environments, respectively. No death of animals was observed during the course of the experiments. In some experiments, AMO-328 (miR-328 specific 2-O-methyl antisense inhibitory oligoribonucleotide) was loaded into the liposome together with siMEG3. The efficiency of MEG3 knockdown by R8-Lip-siMEG3 was confirmed by using Real-Time PCR and FISH.

#### *Right ventricular systemic pressure and ventricular hypertrophy index measurement*

For the hemodynamic measurement, all mice were anesthetized with chloral hydrate (40 mg/kg, i.p.). The right jugular vein was separated; a Mouse Pressure-Volume (PV) Loop Catheters (SPR839, Millar Instrument, Houston, TX) was inserted into the vein and passed into the right ventricle to measure right ventricular systemic pressure (RVSP). The location of the transducer was monitored

by pressure tracing. The pressure signals were exported to a bridge amplifier (PL3508 PowerLab 8/30 Data Acquisition Systems; ADInstruments Pty Ltd., Castle Hill, NSW, Australia) where the signals were amplified and digitized. The data were recorded and later analyzed with the LabChart 8 software.

To evaluate the right ventricular hypertrophy, the right ventricular (RV) was freed from the left ventricular and septum (LV+S), and dried with absorbent paper. The weight ratio of RV/LV+S was calculated.

#### *Echocardiography*

In some experiments, right ventricular and pulmonary artery pressure, cardiac output (CO) was assessed by echocardiography (Philips HD11 XE imaging system/S3-1 probe). Total pulmonary vascular resistance (PVR) was calculated as mean pulmonary arterial pressure (mPAP) divided by cardiac output.

#### *Histological and morphometric analyses*

Mice tissues were fixed in 4% paraformaldehyde for 24 h, and then dehydrated, cleared, and embedded in paraffin wax. The paraffin-embedded tissues were sliced into 5  $\mu$ m-thick sections and stained with hematoxylin and eosin (H&E) or Masson trichrome staining, as appropriate. Images were captured with a fluorescence microscope (Nikon) equipped with a digital camera. A minimum of 10 resistance pulmonary arteries (<100  $\mu$ m external diameter) were analyzed per animal.

#### *Cell Culture*

The mice pulmonary artery smooth muscle cells (mPASMCs) and human pulmonary artery smooth muscle cells (hPASMCs) were purchased from the ScienCell Company (Shanghai, China) and were cultured in smooth muscle cell medium (SMCM) (ScienCell, Shanghai, China) in a humidified incubator with 5% CO<sub>2</sub> at 37 °C. Passages 2 - 4 were used for further experiments. The PASMCs of iPAH patients were provided by Professor Jian Wang from State Key Laboratory of Respiratory Diseases, Guangzhou Institute of Respiratory Disease, and The First Affiliated Hospital of Guangzhou Medical University (Guangzhou, China). The clinical information of the iPAH patients was attached in supplemental Table S1. The usage of these human iPAH-PASMCs was followed the recommendation by Bonnet et.al.<sup>3</sup> Passages 12 - 14 of PASMCs of iPAH patients were used for further experiments. Before each experiment, the cells were incubated in serum-free low-glucose

DMEM for 24 h to stop growth. For hypoxic cultivation, the cells were grown in a Tri-Gas incubator (HF100; Heal Force) with 92%N<sub>2</sub> /5% CO<sub>2</sub> /3% O<sub>2</sub> for the indicated times as described previously.<sup>4</sup>

#### *RNA Isolation and Quantitative Real-Time Polymerase Chain Reaction*

Total RNA from cultured PASCs and mouse tissues were isolated using miRNeasy kits (Qiagen, Hilden, Germany) according to the protocol of Xing et al.<sup>5</sup> For measuring microRNAs or lncRNAs, 100 ng total RNA was reverse transcribed using Prime Script<sup>®</sup> RT reagent Kit (TaKaRa Biotechnology) in a 20 µL reaction. cDNA was used as template for quantitative real-time polymerase chain reaction (PCR) using Fast SYBR Green (Applied Biosystems, Foster City, CA) with lncRNA-MEG3 primer (mouse MEG3, sense 5'-CTTAGCGTGTCTGCCTGTGT-3'; antisense 5'-GGAGGCCAAT GTGTGTATG-3'; human MEG3, sense 5'-GAGTGTTCCTCCCAAGG-3'; antisense 5'-GCGTGCCTTTGGTGATTCAG-3'); miR-328-3p (sense 5'-GGGGGGCAGGAGGGGC-3'; antisense 5'-AGTGCAGGGTCCGAGGTATT-3'). 18s and U6 mRNA was used for normalization. Analysis of relative gene expression levels was performed using the formula  $2^{-\Delta\Delta CT}$  with  $\Delta\Delta CT = (CT_{(\text{target gene in hypoxia group})} - CT_{(\text{control gene in hypoxia group})}) - (CT_{(\text{target gene in control group})} - CT_{(\text{control in control group})})$ .

#### *Oligonucleotides design and transfection in vitro*

To silence the expression of lncRNA-MEG3, PASCs were transfected with the small interfering RNA (siRNA) targets to lncRNA-MEG3 (siMEG3-936, 5'-GCGUCUCCUGUGCC AUUUTT-3' sense; 5'-AAAUGGCACAGGAAGACGCTT-3' antisense), (siMEG3-1147, 5'-CCUCCUGGAUUAGGCCAAATT-3' sense; 5'-UUUGGCCUAAUCCAGGAGGTT-3' antisense) Non-targeted control siRNA (siNC, 5'-UUCUCCGAACGUGUCACGUTT-3' sense; 5'-ACGUGACACGUUCGGAGAATT-3' antisense), using X-treme Gene siRNA Transfection Reagent (Roche). In some experiments, lncRNA-MEG3 was knocked down with gapmers (gapmer-1, TCCATTGCTCATAA; gapmer-3, CACTCCATCACTCATA), which was designed and synthesized by Exiqon (Vedbaek, Denmark).

#### *Cell viability assay*

The mPASCs were transfected with siNC, siMEG3, respectively and cultivated for another 48 h. After 48 h of the incubation in 37°C, the cells were incubated for 4 h in a medium containing 0.5% 3-[4,5-dimethylthiazol-2-yl]-2,5-diphenyl-tetrazolium bromide (MTT). The absorbance was read at 540 nm in a spectrophotometer.

#### *BrdU assay*

5-Bromo-2-deoxyuridine (BrdU) incorporation was detected with Millipore©'s BrdU Cell Proliferation Assay Kit (Millipore, US) according to the provided protocol. Briefly, the cells were treated as indicated, and BrdU was added into the wells and incubated for 4 h. After being fixed by the fixer solution, the anti-BrdU monoclonal antibody and the second antibody were added and incubated for the indicated time period. TMB Peroxidase Substrate was added and incubated for 30 min at room temperature in the dark. Positive wells were visible by a blue color, the intensity of which was proportional to the amount of BrdU incorporation in the proliferating cells. The plates were read using a spectrophotometer microplate reader set at a single wavelength of 450 nm.

#### *Protein preparation and western blot analysis*

Isolated PAs or mPASCs (25 cm<sup>2</sup> culture flask) were lysed into 400 µl of protein lysis buffer containing protease inhibitors. A total of 20µg samples were heated in SDS-PAGE sample buffer at 95°C for 5 min and then were separated by SDS-PAGE gels. Primary antibodies against PCNA (1:500), CyclinA (1:200), CyclinD (1:400), CyclinB (1:400), CDK1 (1:200), CDK2 (1:500), CDK4 (1:500) were incubated in 5% BSA-TBST. Blots were incubated with appropriate horseradish peroxidase (HRP)-conjugated secondary antibody (1:7000) in 5% BSA-TBST for 1 h at room temperature. The immunoreactivity was visualized using enhanced chemiluminescence kit (Beyotime, Guanzhou, China).

#### *Immunofluorescence assay*

The sections of lung tissue or the cultured PASCs were incubated with antibody against Ki67 (1:100), IGF1R (1:100), and Pim 1 (1:150) overnight at 4°C, followed by secondary IgG (Santa Cruz) (1:1000) conjugated with fluorescein isothiocyanate (FITC) or CY3, respectively, for 2 h at 37°C. DAPI (4,6-diamidino-2-phenylindole) was used to label nuclei. Fluorescence images were obtained with a fluorescence microscope.

#### *Cell cycle progression analysis*

The proportion of cells in the G0/G1, S and G2/M phases was detected by flow cytometry, as reported previously.<sup>4</sup> Briefly, the cells were pre-treated with hypoxia with or without other indicated agents and then harvested by trypsinization. Cells were then fixed with 70% ethanol. 25µl of PI (propidium iodide) was added, and then the cells were filtered once through 400-mesh sieves and detected by flow cytometry.

### *Cellular migration assay*

A “wound” was created by a pipette in a mPASM cell monolayer. Images were captured and marked as beginning. The cells were treated as indicated, following hypoxia for 24h, the images were captured, and the images were compared to beginning images to quantify the migration rate of the cells.

### *Computational prediction of lncRNA target*

We used established lncRNA target-prediction algorithms including microran.org and generunner to identify the candidate microRNAs that were potentially targeted by lncRNA-MEG3.

### *Statistical Analysis*

Quantitative data are expressed as the means  $\pm$  SEM. Data analysis was performed with paired Student's t test (for two means) or one-way analysis of variance followed by Dunnett's test (for  $>2$  means) where appropriate. All the experiments were performed using an unbiased method: all the experiments were blindly performed and analysed. Finally, a biostatistician has performed and approved the statistics used in the present study. Sample sizes (n) were reported in the corresponding figure legend. Significance levels of  $P < 0.01$  (\*\*) and  $0.05$  (\*) were considered statistically significant.

### **Reference for Online Supplement**

1. Provencher, S, Archer, SL, Ramirez, FD, Hibbert, B, Paulin, R, Boucherat, O, *et al.* (2018). Standards and Methodological Rigor in Pulmonary Arterial Hypertension Preclinical and Translational Research. *Circulation research* **122**: 1021-1032.
2. Ma, J, Liang, S, Wang, Z, Zhang, L, Jiang, J, Zheng, J, *et al.* (2010). ROCK pathway participates in the processes that 15-hydroxyeicosatetraenoic acid (15-HETE) mediated the pulmonary vascular remodeling induced by hypoxia in rat. *Journal of cellular physiology* **222**: 82-94.
3. Bonnet, S, Provencher, S, Guignabert, C, Perros, F, Boucherat, O, Schermuly, RT, *et al.* (2017). Translating Research into Improved Patient Care in Pulmonary Arterial Hypertension. *American journal of respiratory and critical care medicine* **195**: 583-595.
4. Ma, C, Li, Y, Ma, J, Liu, Y, Li, Q, Niu, S, *et al.* (2011). Key role of 15-lipoxygenase/15-hydroxyeicosatetraenoic acid in pulmonary vascular remodeling and vascular angiogenesis associated with hypoxic pulmonary hypertension. *Hypertension* **58**: 679-688.
5. Xing, Y, Zheng, X, Li, G, Liao, L, Cao, W, Xing, H, *et al.* (2015). MicroRNA-30c contributes to the development of hypoxia pulmonary hypertension by inhibiting platelet-derived growth factor receptor beta expression. *The international journal of biochemistry & cell biology* **64**: 155-166.
